# Supplementary material for: Trio-Based Low-Pass Genome Sequencing Reveals Characteristics and Significance of Rare Copy Number Variants in Prenatal Diagnosis
Source: Front Genet. 2021 Sep 20;12:742325. doi: 10.3389/fgene.2021.742325 (PMC8488434; doi:10.3389/fgene.2021.742325)
Supplement: Supplementary file 2 [file Data_Sheet_2.xlsx]

## Sheet: Supp Table S1
Supplementary Table S1. Demographics of the 315 case and the parents
Group	Mean	Median	95% Confidence Interval for Mean
			Lower bound	Upper bound
Maternal age at conception (Year)	34.26	34.41	33.77	34.74
Paternal age at conception (Year)	36.67	36.43	36.08	37.25
Gestational age in weeks (Week)	18	17.5714	17.5	18.2857

## Sheet: Supp Table S2
Supplementary Table S2. 603 Rare CNVs identified in proband.
Case ID	Submitted sample type (CVS, AF or Cord Blood)	Referral indication(s)	Rare CNV	Constitutional/mosaic	Mode of Inheritance	Final classification (P/LP, VUS, or benign)
20C1984	AF	ad mat age, US: NT 4.8mm at 12 weeks, smallchin, ? Cleft palate	seq[GRCh37] del(7)(p22.1) chr7:g.6012914_6583141del	Constitutional	de novo	VUS
20C2396	AF	ad mat age, Non-invasive prenatal screening: HR for monosomy x on Panorama test	seq[GRCh37] del(X)(p22.33p11.21) chrX:g.59997_58071562del	Constitutional	de novo	P/LP
20C2543	AF	US: bil ventriculomegaly & persistent left SVC, Non-invasive prenatal screening: dup (6q15-q22.31, 31.39M)	seq[GRCh37] dup(6)(q15q22.31) chr6:g.88978285_120313449dup	Constitutional	de novo	P/LP
20C2630	AF	Non-invasive prenatal screening: Deletion of Xq21.1-Xq21.33, 19 Mb	seq[GRCh37] del(X)(q21.1q21.33) chrX:g.78856351_98168694del	Constitutional	de novo	P/LP
20C3032	AF	US: Fetal anomalies: cystic hygroma, Non-invasive prenatal screening: increased DNA from chromosome 4 of spanning between 4q28.2-4q32.3	seq[GRCh37] dup(4)(q28.3) chr4:g.131115786_134164088dup	Constitutional	de novo	P/LP
20C3032	AF	US: Fetal anomalies: cystic hygroma, Non-invasive prenatal screening: increased DNA from chromosome 4 of spanning between 4q28.2-4q32.3	seq[GRCh37] dup(4)(q28.3q32.3) chr4:g.135792847_165054846dup	Constitutional	de novo	P/LP
21C0064	AF	Non-invasive prenatal screening: del(13q13.3-q14.11, 5.68M)	seq[GRCh37] del(13)(q13.3q14.11) chr13:g.37949747_44057552del	Constitutional	de novo	VUS
18C2076	AF	Non-invasive prenatal screening: del(15q11.2-q13.1,5.48M)	seq[GRCh37] del(8)(q23.1) chr8:g.110109537_110219129del	Constitutional	de novo	Benign
19C0486	CVS	US: Fetal anomalies: thicken NT 3.5mm, mild TR, left pleural effusion	seq[GRCh37] dup(15)(q21.3) chr15:g.57202051_58172103dup	Constitutional	de novo	Benign
19C1006	AF	Familial chr.abn.: 47,XN,+mar	seq[GRCh37] dup(2)(q11.1q11.2) chr2:g.95331353_100977256dup	Constitutional	de novo	P/LP
19C1316	CVS	US: Fetal anomalies: Omphalocele 1.85x1.74x1.91cm	seq[GRCh37] dup(16)(p13.11) chr16:g.14911322_16543602dup	Constitutional	de novo	Benign
19C1529	AF	Non-invasive prenatal screening: Safety T21 consistent interference	seq[GRCh37] del(11)(q22.3) chr11:g.103459654_103644318del	Constitutional	de novo	Benign
19C1529	AF	Non-invasive prenatal screening: Safety T21 consistent interference	seq[GRCh37] dup(X)(q27.3) chrX:g.144285467_144364278dup	Constitutional	de novo	Benign
19C1534	AF	Non-invasive prenatal screening: del(Xq13.2-q24,44.39M)	seq[GRCh37] del(X)(q13.2q24) chrX:g.73743276_117460856del	Constitutional	de novo	P/LP
19C1778	AF	positive Down screening: Risk: 235	seq[GRCh37] dup(18)(q12.3) chr18:g.42995657_43104692dup	Constitutional	de novo	Benign
19C1854	AF	USG: male, Non-invasive prenatal screening: SafeT21 twice borderline increase in chromosome 13	seq[GRCh37] del(13)(q34) chr13:g.114806588_115105104del	Constitutional	de novo	P/LP
19C1911	AF	US: Fetal anomalies: fetal absent DB + abnormal umbilical vein drainage	seq[GRCh37] dup(2)(q21.1) chr2:g.130782545_131141746dup	Constitutional	de novo	Benign
19C2358	AF	US: Fetal anomalies: aberrant right subclavian artery, unilateral cystic dysplastic kidney, ? small ear, increased liquor. Non-invasive prenetal screening: 1st sample T21 showed borderline abnormal microdeletion, 2nd sample T21 normal.	seq[GRCh37] del(22)(q11.21) chr22:g.18912476_21530071del	Constitutional	de novo	P/LP
19C2834	AF	US: Right sided aortic arch	seq[GRCh37] del(7)(p14.2) chr7:g.35462230_36830203del	Constitutional	de novo	P/LP
19C2924	AF	positive Down screening risk: 1:117, NT 1.9mm	seq[GRCh37] del(5)(p15.33p14.1) chr5:g.9994_26970792del	Constitutional	de novo	P/LP
19C3027	CVS	US: Fetal anomalies: NT 7.7 mm, umbilical hernia	seq[GRCh37] del(7)(q34q36.3) chr7:g.141319820_159121691del	Constitutional	de novo	P/LP
19C3027	CVS	US: Fetal anomalies: NT 7.7 mm, umbilical hernia	seq[GRCh37] dup(7)(p22.3p21.2) chr7:g.9992_15402317dup	Constitutional	de novo	P/LP
19C3077	AF	Non-invasive prenatal screening: SafeT21: Borderline reduction in chrromosome X, USG: female	seq[GRCh37] dup(22)(q11.21) chr22:g.18642389_19007560dup	Constitutional	de novo	Benign
19C3077	AF	Non-invasive prenatal screening: SafeT21: Borderline reduction in chrromosome X, USG: female	seq[GRCh37] del(9)(p23) chr9:g.11826375_12308314del	Constitutional	de novo	Benign
19C3280	AF	Non-invasive prenatal screening: increase 10q	seq[GRCh37] dup(10)(q11.22q11.23) chr10:g.47071337_51834810dup	Constitutional	de novo	P/LP
19C3367	AF	MCDA twins, TTTS stage 2 for laser therapy	seq[GRCh37] del(12)(q24.32) chr12:g.126935424_126993422del	Constitutional	de novo	Benign
19C3464	AF	US: Fetal anomalies: SUA, megacystis, NT 3.7 mm, PS, MR, TR, echogenic bowel, hydrops	seq[GRCh37] dup(16)(p11.2) chr16:g.28487035_29439156dup	Constitutional	de novo	VUS
19C3556	AF	US: Fetal anomalies: Ambiguous genitalia, short FL, NIPT: XY	seq[GRCh37] dup(5)(q12.1) chr5:g.62039757_62107787dup	Constitutional	de novo	Benign
19C3563	CVS	US: Fetal anomalies: cardiomegaly, tricuspid valve abn, +/- pul. valve abn	seq[GRCh37] del(6)(q22.31) chr6:g.118750320_118865060del	Constitutional	de novo	Benign
20C0034	AF	Non-invasive prenatal screening: abnormal sex chromosome, low level of Y	seq[GRCh37] del(Y)(q11.21q12) chrY:g.13874367_58993066del	Constitutional	de novo	P/LP
20C0339	AF	US: Fetal anomalies: fetal right arotic arch, Non- invasive prenatal screening: China: 22q deletion	seq[GRCh37] del(22)(q11.21) chr22:g.18871037_21521916del	Constitutional	de novo	P/LP
20C0475	AF	ad mat age, positive Down screening risk: 1:2	seq[GRCh37] del(9)(q34.3) chr9:g.140608440_140673160del	Constitutional	de novo	P/LP
20C0515	AF	Non-invasive prenatal screening: increase DNA from chromosome 8	seq[GRCh37] dup(17)(q21.31) chr17:g.41401577_41748158dup	Constitutional	de novo	Benign
20C0726	AF	US: Fetal anomalies: intracardiac echogenic foci + echogenic bowel	seq[GRCh37] del(8)(p23.1) chr8:g.6226691_6494457del	Constitutional	de novo	Benign
20C1011	AF	US: Fetal anomalies: cystic hygroma	seq[GRCh37] del(8)(q23.2) chr8:g.111229945_111294607del	Constitutional	de novo	Benign
20C1831	AF	Non-invasive prenatal screening: SafeT21: decreased Xp chromosome	seq[GRCh37] del(4)(q28.3) chr4:g.134921991_135192465del	Constitutional	de novo	Benign
20C1831	AF	Non-invasive prenatal screening: SafeT21: decreased Xp chromosome	seq[GRCh37] del(X)(p22.33p11.21) chrX:g.59997_57457892del	Constitutional	de novo	P/LP
19C0486	CVS	US: Fetal anomalies: thicken NT 3.5mm, mild TR, left pleural effusion	seq[GRCh37] dup(15)(q21.3) chr15:g.58177424_58501880dup	Constitutional	de novo	VUS
20C2935	AF	Non-invasive prenatal screening: High risk 22q11.2 DiGeorge	seq[GRCh37] del(22)(q11.21) chr22:g.18912979_21443877del	Constitutional	de novo	P/LP
20C3078	AF	Non-invasive prenatal screening: NIFTY: del(22q11.2, 2.85M)	seq[GRCh37] del(22)(q11.21) chr22:g.18912979_21443877del	Constitutional	de novo	P/LP
20C1890	AF	US: Fetal anomalies: ? Syndactyly	seq[GRCh37] del(4)(q22.1) chr4:g.92881186_92942315del	Constitutional	Inherited	Benign
20C1890	AF	US: Fetal anomalies: ? Syndactyly	seq[GRCh37] dup(6)(p21.1) chr6:g.41231738_41388999dup	Constitutional	Inherited	Benign
20C1890	AF	US: Fetal anomalies: ? Syndactyly	seq[GRCh37] dup(10)(p11.23) chr10:g.30113852_30263237dup	Constitutional	Inherited	Benign
20C1890	AF	US: Fetal anomalies: ? Syndactyly	seq[GRCh37] dup(10)(q21.1) chr10:g.58988529_59030468dup	Constitutional	Inherited	Benign
20C1890	AF	US: Fetal anomalies: ? Syndactyly	seq[GRCh37] del(11)(q14.3) chr11:g.91047209_91140148del	Constitutional	Inherited	Benign
20C1890	AF	US: Fetal anomalies: ? Syndactyly	seq[GRCh37] del(11)(q22.1) chr11:g.100279227_100396852del	Constitutional	Inherited	Benign
20C1910	AF	Previous child/ pregnancy with chr abn: ARPKD carrier	seq[GRCh37] dup(4)(q13.1) chr4:g.64566838_65114320dup	Constitutional	Inherited	Benign
20C1983	AF	ad mat age, Others: embryo mosaic aneuploid, please see report	seq[GRCh37] dup(2)(p16.1) chr2:g.57846610_57911914dup	Constitutional	Inherited	Benign
20C1983	AF	ad mat age, Others: embryo mosaic aneuploid, please see report	seq[GRCh37] del(20)(p12.3) chr20:g.8206178_8280980del	Constitutional	Inherited	Benign
20C1958	AF	positive Down screening on FTS, low BHCG, low PAPP-A, low PlGF, increased risk of T21, T18, T13	seq[GRCh37] del(13)(q31.1) chr13:g.81967720_82028142del	Constitutional	Inherited	Benign
20C1958	AF	positive Down screening on FTS, low BHCG, low PAPP-A, low PlGF, increased risk of T21, T18, T13	seq[GRCh37] dup(21)(q22.2) chr21:g.40115172_40153628dup	Constitutional	Inherited	Benign
20C1950	AF	Non-invasive prenatal screening: Reduction of DNA on chr. 10 spanning between 10q11.2-10q11.23	seq[GRCh37] dup(X)(q22.3) chrX:g.105507838_105555324dup	Constitutional	Inherited	Benign
20C1902	AF	DCDA twin pregnancy, Non-invasive prenatal screening: positive Trisomy 18	seq[GRCh37] del(14)(q21.2) chr14:g.46584088_46661894del	Constitutional	Inherited	Benign
20C1812	AF	Non-invasive prenatal screening: SafeT21: borderline increased chr. 18	seq[GRCh37] dup(12)(q24.11) chr12:g.110838969_111033925dup	Constitutional	Inherited	Benign
20C1812	AF	Non-invasive prenatal screening: SafeT21: borderline increased chr. 18	seq[GRCh37] dup(14)(q23.2) chr14:g.62635463_62789089dup	Constitutional	Inherited	Benign
20C1812	AF	Non-invasive prenatal screening: SafeT21: borderline increased chr. 18	seq[GRCh37] dup(21)(q21.2) chr21:g.24568882_24734487dup	Constitutional	Inherited	Benign
20C1812	AF	Non-invasive prenatal screening: SafeT21: borderline increased chr. 18	seq[GRCh37] dup(21)(q21.2) chr21:g.25078663_25276437dup	Constitutional	Inherited	Benign
20C2141	AF	Familial chr: abn: α-thal couple	seq[GRCh37] dup(1)(p31.1) chr1:g.77542548_78017623dup	Constitutional	Inherited	Benign
20C2141	AF	Familial chr: abn: α-thal couple	seq[GRCh37] del(6)(q11.1) chr6:g.62184491_62254043del	Constitutional	Inherited	Benign
20C2141	AF	Familial chr: abn: α-thal couple	seq[GRCh37] dup(16)(p13.2) chr16:g.9309151_9367823dup	Constitutional	Inherited	Benign
20C2141	AF	Familial chr: abn: α-thal couple	seq[GRCh37] dup(18)(p11.21) chr18:g.11002045_11525880dup	Constitutional	Inherited	Benign
20C2141	AF	Familial chr: abn: α-thal couple	seq[GRCh37] dup(20)(q13.2) chr20:g.53589742_53632648dup	Constitutional	Inherited	Benign
20C2164	AF	US: Fetal anomalies: sinus bradycardia, VSD	seq[GRCh37] dup(7)(q35) chr7:g.146741996_147611486dup	Constitutional	Inherited	Benign
20C2164	AF	US: Fetal anomalies: sinus bradycardia, VSD	seq[GRCh37] del(9)(p21.1) chr9:g.28693988_28744616del	Constitutional	Inherited	Benign
20C2164	AF	US: Fetal anomalies: sinus bradycardia, VSD	seq[GRCh37] dup(15)(q26.3) chr15:g.101669317_102189783dup	Constitutional	Inherited	Benign
20C2276	AF	ad mat age, Non-invasive prenatal screening: NIFTY- 47XYY	seq[GRCh37] del(5)(p14.1) chr5:g.25069109_25193354del	Constitutional	Inherited	Benign
20C2271	AF	Non-invasive prenatal screening: SafeT21 express: showed increased in chromosome 13 DNA is detected.	seq[GRCh37] dup(5)(q21.1) chr5:g.99141035_99186804dup	Constitutional	Inherited	Benign
20C2271	AF	Non-invasive prenatal screening: SafeT21 express: showed increased in chromosome 13 DNA is detected.	seq[GRCh37] del(9)(q33.2) chr9:g.123818594_123896469del	Constitutional	Inherited	Benign
20C2271	AF	Non-invasive prenatal screening: SafeT21 express: showed increased in chromosome 13 DNA is detected.	seq[GRCh37] dup(10)(p15.3) chr10:g.276070_563607dup	Constitutional	Inherited	Benign
20C2271	AF	Non-invasive prenatal screening: SafeT21 express: showed increased in chromosome 13 DNA is detected.	seq[GRCh37] dup(10)(p15.3) chr10:g.627059_688169dup	Constitutional	Inherited	Benign
20C2392	AF	US: Fetal anomalies: PLSVC	seq[GRCh37] del(17)(q22) chr17:g.50540199_50833944del	Constitutional	Inherited	Benign
20C2396	AF	ad mat age, Non-invasive prenatal screening: HR for monosomy x on Panorama test	seq[GRCh37] dup(9)(p23) chr9:g.9117339_9466684dup	Constitutional	Inherited	Benign
20C2447	AF	Non-invasive prenatal screening: mild increase in Trisomy 21	seq[GRCh37] dup(8)(p22) chr8:g.16046145_16478431dup	Constitutional	Inherited	Benign
20C2447	AF	Non-invasive prenatal screening: mild increase in Trisomy 21	seq[GRCh37] dup(8)(p22) chr8:g.16574477_16780602dup	Constitutional	Inherited	Benign
20C2447	AF	Non-invasive prenatal screening: mild increase in Trisomy 21	seq[GRCh37] dup(12)(q23.3) chr12:g.104550022_104804728dup	Constitutional	Inherited	Benign
20C2529	AF	US: Fetal anomalies: ? Bilateral PUJ obstructive reflux (mild)	seq[GRCh37] dup(6)(p11.2) chr6:g.57600385_58076323dup	Constitutional	Inherited	Benign
20C2529	AF	US: Fetal anomalies: ? Bilateral PUJ obstructive reflux (mild)	seq[GRCh37] dup(12)(p11.21) chr12:g.31811833_31948097dup	Constitutional	Inherited	Benign
20C2582	AF	Non-invasive prenatal screening: 10q11.22-10q21.1, 4MB deletion	seq[GRCh37] dup(4)(q31.3) chr4:g.151882225_151941625dup	Constitutional	Inherited	Benign
20C2582	AF	Non-invasive prenatal screening: 10q11.22-10q21.1, 4MB deletion	seq[GRCh37] del(10)(q11.22q11.23) chr10:g.49225801_51126687del	Constitutional	Inherited	VUS
20C2582	AF	Non-invasive prenatal screening: 10q11.22-10q21.1, 4MB deletion	seq[GRCh37] del(10)(q11.23) chr10:g.51738639_52457286del	Constitutional	Inherited	Benign
20C2583	AF	US: Fetal anomalies: Bilateral pleural effusion	seq[GRCh37] del(5)(p14.3) chr5:g.20631339_20834013del	Constitutional	Inherited	Benign
20C2583	AF	US: Fetal anomalies: Bilateral pleural effusion	seq[GRCh37] dup(21)(q21.1) chr21:g.21641305_21804723dup	Constitutional	Inherited	Benign
20C2593	AF	Previous child/ pregnancy with chr abn: Mosaic T12 & short long bones	seq[GRCh37] del(20)(p12.1) chr20:g.14830428_14953514del	Constitutional	Inherited	Benign
20C2594	AF	Non-invasive prenatal screening: <3.08MB, 22q11.1 deletion	seq[GRCh37] dup(3)(p12.2) chr3:g.81108909_81160817dup	Constitutional	Inherited	Benign
20C2543	AF	US: bil ventriculomegaly & persistent left SVC, Non-invasive prenatal screening: dup (6q15-q22.31, 31.39M)	seq[GRCh37] del(5)(p14.3) chr5:g.19144165_19211560del	Constitutional	Inherited	Benign
20C2543	AF	US: bil ventriculomegaly & persistent left SVC, Non-invasive prenatal screening: dup (6q15-q22.31, 31.39M)	seq[GRCh37] del(8)(p23.1) chr8:g.8298218_8353601del	Constitutional	Inherited	Benign
20C2679	CVS	US: Fetal anomalies: DCDA twins with left twin NT 4.1mm	seq[GRCh37] del(12)(p12.3) chr12:g.16831248_16998068del	Constitutional	Inherited	Benign
20C2702	AF	US: anomaly seen absent nasal bone on one side	seq[GRCh37] dup(1)(p31.1) chr1:g.79272035_79328670dup	Constitutional	Inherited	Benign
20C2702	AF	US: anomaly seen absent nasal bone on one side	seq[GRCh37] dup(16)(p11.2) chr16:g.31373130_31422318dup	Constitutional	Inherited	Benign
20C2798	AF	Non-invasive prenatal screening: increased DNA 8q11.1-8q24.3	seq[GRCh37] del(8)(p23.3) chr8:g.1019574_1123801del	Constitutional	Inherited	Benign
20C2798	AF	Non-invasive prenatal screening: increased DNA 8q11.1-8q24.3	seq[GRCh37] dup(10)(q23.1) chr10:g.84218067_84416667dup	Constitutional	Inherited	Benign
20C2821	AF	ad mat age, Non-invasive prenatal screening: NIPT increased DNA for (8 Mb)12p13.33-12p13.31, NIPT increased DNA for (25 Mb) 12p13.31-12p11.1	seq[GRCh37] del(2)(p22.1) chr2:g.41514394_41576196del	Constitutional	Inherited	Benign
20C2835	AF	IVF pregnancy: one day 3 frozen and one day 5 frozen embryo transferred early USG-> one fetus, Non-invasive prenatal screening: NIPT (11w) total Fetal Fraction 13%, with Y Fraction 1.39%, repeat NIPT (13w) total Fetal Fraction 7.4%, Y Fraction 0.62%	seq[GRCh37] dup(3)(q11.2) chr3:g.97698725_97782659dup	Constitutional	Inherited	Benign
20C2834	AF	ad mat age, Non-invasive prenatal screening: high risk of XXX	seq[GRCh37] dup(2)(p25.3) chr2:g.1012670_1519189dup	Constitutional	Inherited	Benign
20C2834	AF	ad mat age, Non-invasive prenatal screening: high risk of XXX	seq[GRCh37] dup(2)(p25.3) chr2:g.1552333_1860287dup	Constitutional	Inherited	Benign
20C2834	AF	ad mat age, Non-invasive prenatal screening: high risk of XXX	seq[GRCh37] dup(11)(p11.12) chr11:g.50101769_50762171dup	Constitutional	Inherited	Benign
20C2946	AF	Others: PGT-A 30% of mosaic 10	seq[GRCh37] del(5)(q34) chr5:g.163616867_163699931del	Constitutional	Inherited	Benign
20C2946	AF	Others: PGT-A 30% of mosaic 10	seq[GRCh37] dup(10)(q21.1) chr10:g.56921391_57073599dup	Constitutional	Inherited	Benign
20C2946	AF	Others: PGT-A 30% of mosaic 10	seq[GRCh37] dup(15)(q21.1) chr15:g.46374046_46532360dup	Constitutional	Inherited	Benign
20C2946	AF	Others: PGT-A 30% of mosaic 10	seq[GRCh37] dup(17)(p11.2) chr17:g.16074095_16239413dup	Constitutional	Inherited	Benign
20C2946	AF	Others: PGT-A 30% of mosaic 10	seq[GRCh37] del(18)(q12.1) chr18:g.28960243_29011744del	Constitutional	Inherited	Benign
20C2935	AF	Non-invasive prenatal screening: High risk 22q11.2 DiGeorge	seq[GRCh37] dup(7)(q36.1) chr7:g.151820305_151958142dup	Constitutional	Inherited	Benign
20C2935	AF	Non-invasive prenatal screening: High risk 22q11.2 DiGeorge	seq[GRCh37] del(20)(p12.1) chr20:g.14711713_14798891del	Constitutional	Inherited	Benign
20C2963	CVS	Translocation carrier: cryptic balanced translocation between 14q terminal and 22q terminal, Previous child/ pregnancy with chr abn: (pregnancy) 2015, 2016 MTOP x loss of chr 22q13.31-33 (4mb), Others: Both couple are carrier of GJB2 mutant NM_004004.5(GJB2): c.109 G>A	seq[GRCh37] dup(5)(q23.1) chr5:g.119830430_119965239dup	Constitutional	Inherited	Benign
20C3011	AF	Non-invasive prenatal screening: high risks for trisomies 13, 18 & triploidy	seq[GRCh37] dup(3)(p26.1) chr3:g.8248252_8317728dup	Constitutional	Inherited	Benign
20C3011	AF	Non-invasive prenatal screening: high risks for trisomies 13, 18 & triploidy	seq[GRCh37] dup(3)(q26.31) chr3:g.173245959_173321673dup	Constitutional	Inherited	Benign
20C3011	AF	Non-invasive prenatal screening: high risks for trisomies 13, 18 & triploidy	seq[GRCh37] dup(4)(q13.2) chr4:g.70294074_70376459dup	Constitutional	Inherited	Benign
20C3011	AF	Non-invasive prenatal screening: high risks for trisomies 13, 18 & triploidy	seq[GRCh37] dup(4)(q34.3) chr4:g.178829969_179097454dup	Constitutional	Inherited	Benign
20C3008	Cord Bld	US: Fetal anomalies: Amniotic band syndrome involving digits of all 4 limbs	seq[GRCh37] dup(1)(p21.2) chr1:g.100043465_100751526dup	Constitutional	Inherited	Benign
20C3008	Cord Bld	US: Fetal anomalies: Amniotic band syndrome involving digits of all 4 limbs	seq[GRCh37] del(2)(p16.3) chr2:g.52423606_52555285del	Constitutional	Inherited	Benign
20C3008	Cord Bld	US: Fetal anomalies: Amniotic band syndrome involving digits of all 4 limbs	seq[GRCh37] dup(2)(q37.1) chr2:g.233183984_233319530dup	Constitutional	Inherited	Benign
20C3070	AF	US: Fetal anomalies: left cleft lip	seq[GRCh37] del(14)(q32.2) chr14:g.96638500_96762802del	Constitutional	Inherited	Benign
20C3153	AF	Non-invasive prenatal screening: NIFTY: high risk for Trisomy 9	seq[GRCh37] dup(2)(p23.3) chr2:g.24318379_24562465dup	Constitutional	Inherited	Benign
20C3153	AF	Non-invasive prenatal screening: NIFTY: high risk for Trisomy 9	seq[GRCh37] del(13)(q21.1) chr13:g.55923821_56105912del	Constitutional	Inherited	Benign
20C3153	AF	Non-invasive prenatal screening: NIFTY: high risk for Trisomy 9	seq[GRCh37] dup(18)(p11.21) chr18:g.13647295_14300267dup	Constitutional	Inherited	Benign
20C3160	AF	Non-invasive prenatal screening: mild increase chr 13	seq[GRCh37] dup(1)(p32.3) chr1:g.53195917_53477134dup	Constitutional	Inherited	Benign
20C3160	AF	Non-invasive prenatal screening: mild increase chr 13	seq[GRCh37] del(2)(q33.1) chr2:g.201434018_201565662del	Constitutional	Inherited	Benign
20C3160	AF	Non-invasive prenatal screening: mild increase chr 13	seq[GRCh37] dup(7)(q35) chr7:g.143427288_143934641dup	Constitutional	Inherited	Benign
20C3160	AF	Non-invasive prenatal screening: mild increase chr 13	seq[GRCh37] dup(14)(q21.3) chr14:g.49563078_49630134dup	Constitutional	Inherited	Benign
21C0034	AF	US: Fetal anomalies: ventriculomegaly, hypoplastic aorta	seq[GRCh37] del(16)(p11.2) chr16:g.29582704_30197139del	Constitutional	Inherited	P/LP
21C0064	AF	Non-invasive prenatal screening: del(13q13.3-q14.11, 5.68M)	seq[GRCh37] dup(2)(p21) chr2:g.47614526_47661480dup	Constitutional	Inherited	Benign
21C0064	AF	Non-invasive prenatal screening: del(13q13.3-q14.11, 5.68M)	seq[GRCh37] dup(X)(q11.1) chrX:g.61682136_61726558dup	Constitutional	Inherited	Benign
21C0144	AF	US: Fetal anomalies: single umbilical artery seen, fetal heart is deviated to the left, PA (3.8mm) larger then AO (2.3mm), RV (10.9mm) appears larger then LV (7.6mm), an extra vessel is noted to the left of the pulmonary artery at the cardiac three vessel view – suspicious of a persistent left superior vena cava, myocardium appears thickened on right side (thickness: 3.5 mm), report attached	seq[GRCh37] dup(1)(p34.1) chr1:g.46237043_46714516dup	Constitutional	Inherited	Benign
21C0144	AF	US: Fetal anomalies: single umbilical artery seen, fetal heart is deviated to the left, PA (3.8mm) larger then AO (2.3mm), RV (10.9mm) appears larger then LV (7.6mm), an extra vessel is noted to the left of the pulmonary artery at the cardiac three vessel view – suspicious of a persistent left superior vena cava, myocardium appears thickened on right side (thickness: 3.5 mm), report attached	seq[GRCh37] dup(5)(p11) chr5:g.46321059_47906484dup	Constitutional	Inherited	Benign
21C0144	AF	US: Fetal anomalies: single umbilical artery seen, fetal heart is deviated to the left, PA (3.8mm) larger then AO (2.3mm), RV (10.9mm) appears larger then LV (7.6mm), an extra vessel is noted to the left of the pulmonary artery at the cardiac three vessel view – suspicious of a persistent left superior vena cava, myocardium appears thickened on right side (thickness: 3.5 mm), report attached	seq[GRCh37] dup(8)(q11.1) chr8:g.46879515_46932134dup	Constitutional	Inherited	Benign
21C0144	AF	US: Fetal anomalies: single umbilical artery seen, fetal heart is deviated to the left, PA (3.8mm) larger then AO (2.3mm), RV (10.9mm) appears larger then LV (7.6mm), an extra vessel is noted to the left of the pulmonary artery at the cardiac three vessel view – suspicious of a persistent left superior vena cava, myocardium appears thickened on right side (thickness: 3.5 mm), report attached	seq[GRCh37] dup(9)(p24.2) chr9:g.4242201_4326762dup	Constitutional	Inherited	Benign
21C0144	AF	US: Fetal anomalies: single umbilical artery seen, fetal heart is deviated to the left, PA (3.8mm) larger then AO (2.3mm), RV (10.9mm) appears larger then LV (7.6mm), an extra vessel is noted to the left of the pulmonary artery at the cardiac three vessel view – suspicious of a persistent left superior vena cava, myocardium appears thickened on right side (thickness: 3.5 mm), report attached	seq[GRCh37] dup(11)(p11.12) chr11:g.50632150_51218943dup	Constitutional	Inherited	Benign
21C0144	AF	US: Fetal anomalies: single umbilical artery seen, fetal heart is deviated to the left, PA (3.8mm) larger then AO (2.3mm), RV (10.9mm) appears larger then LV (7.6mm), an extra vessel is noted to the left of the pulmonary artery at the cardiac three vessel view – suspicious of a persistent left superior vena cava, myocardium appears thickened on right side (thickness: 3.5 mm), report attached	seq[GRCh37] dup(12)(q12) chr12:g.38332821_38369454dup	Constitutional	Inherited	Benign
21C0144	AF	US: Fetal anomalies: single umbilical artery seen, fetal heart is deviated to the left, PA (3.8mm) larger then AO (2.3mm), RV (10.9mm) appears larger then LV (7.6mm), an extra vessel is noted to the left of the pulmonary artery at the cardiac three vessel view – suspicious of a persistent left superior vena cava, myocardium appears thickened on right side (thickness: 3.5 mm), report attached	seq[GRCh37] dup(19)(q11) chr19:g.28012349_28069297dup	Constitutional	Inherited	Benign
21C0208	AF	US: Fetal anomalies: Persistent left SVC, P1 normal, P2 TOP for Noonan Syndrome hydrops	seq[GRCh37] dup(X)(p11.22) chrX:g.52573915_52640834dup	Constitutional	Inherited	Benign
21C0209	AF	Non-invasive prenatal screening: Elevation of DNA 13q	seq[GRCh37] del(2)(q35) chr2:g.220690696_220805877del	Constitutional	Inherited	Benign
21C0209	AF	Non-invasive prenatal screening: Elevation of DNA 13q	seq[GRCh37] del(19)(q13.41) chr19:g.52836550_52916829del	Constitutional	Inherited	Benign
20C0801	AF	Non-invasive prenatal screening: increase chromosome 8	seq[GRCh37] del(3)(p24.1) chr3:g.30267428_30347450del	Constitutional	Inherited	Benign
19C1507	CVS	positive Down screening risk: 1:2, T13 & T18 positive, US: NT 5.3mm	seq[GRCh37] del(3)(q26.1) chr3:g.167246081_167321476del	Constitutional	Inherited	Benign
19C0970	AF	US: Fetal anomalies: Bilateral club feet of left twin, DLTA with fetal reductionn-> DCDA	seq[GRCh37] dup(6)(q22.31) chr6:g.119118154_119222161dup	Constitutional	Inherited	Benign
19C0970	AF	US: Fetal anomalies: Bilateral club feet of left twin, DLTA with fetal reductionn-> DCDA	seq[GRCh37] dup(11)(p13) chr11:g.33161923_33372614dup	Constitutional	Inherited	Benign
19C0970	AF	US: Fetal anomalies: Bilateral club feet of left twin, DLTA with fetal reductionn-> DCDA	seq[GRCh37] dup(12)(q14.2) chr12:g.63933721_64127857dup	Constitutional	Inherited	Benign
19C1332	CVS	US: Fetal anomalies: cystic hygroma with NT 4.8mm	seq[GRCh37] del(4)(p16.3) chr4:g.94865_160665del	Constitutional	Inherited	Benign
19C1332	CVS	US: Fetal anomalies: cystic hygroma with NT 4.8mm	seq[GRCh37] del(16)(q23.1) chr16:g.75698155_75796613del	Constitutional	Inherited	Benign
19C0821	AF	US: Fetal anomalies: right aortic arch	seq[GRCh37] dup(4)(q35.2) chr4:g.188223256_188313310dup	Constitutional	Inherited	Benign
19C0821	AF	US: Fetal anomalies: right aortic arch	seq[GRCh37] dup(7)(p21.1) chr7:g.17417089_17493068dup	Constitutional	Inherited	Benign
19C0821	AF	US: Fetal anomalies: right aortic arch	seq[GRCh37] dup(7)(q11.21) chr7:g.63772227_63980195dup	Constitutional	Inherited	Benign
19C0821	AF	US: Fetal anomalies: right aortic arch	seq[GRCh37] dup(21)(q21.2) chr21:g.24738224_24796698dup	Constitutional	Inherited	Benign
19C1827	AF	Maternal anxiety	seq[GRCh37] dup(2)(p16.1) chr2:g.56285783_56394696dup	Constitutional	Inherited	Benign
19C2509	AF	US: Fetal anomalies: fetal bil polydactyly, involving thumbs on both sides, non-invasive prenatal screening: negative	seq[GRCh37] dup(4)(p15.31) chr4:g.21078613_21169094dup	Constitutional	Inherited	Benign
19C2509	AF	US: Fetal anomalies: fetal bil polydactyly, involving thumbs on both sides, non-invasive prenatal screening: negative	seq[GRCh37] dup(X)(p11.21) chrX:g.57723119_57752771dup	Constitutional	Inherited	Benign
19C0031	CVS	Previous child/ pregnancy with chr abn: Fetal anomalies: Previous baby 22q11, anxiety, NT 2.7mm	seq[GRCh37] del(3)(q26.1) chr3:g.165445629_165631240del	Constitutional	Inherited	Benign
19C0031	CVS	Previous child/ pregnancy with chr abn: Fetal anomalies: Previous baby 22q11, anxiety, NT 2.7mm	seq[GRCh37] del(5)(q21.1) chr5:g.101454145_101561139del	Constitutional	Inherited	Benign
19C0031	CVS	Previous child/ pregnancy with chr abn: Fetal anomalies: Previous baby 22q11, anxiety, NT 2.7mm	seq[GRCh37] dup(13)(q21.1) chr13:g.59012075_59119747dup	Constitutional	Inherited	Benign
19C0514	AF	Non-invasive prenatal screening: 45 XO	seq[GRCh37] del(4)(q13.1) chr4:g.64030920_64422336del	Constitutional	Inherited	Benign
19C0514	AF	Non-invasive prenatal screening: 45 XO	seq[GRCh37] dup(11)(p12) chr11:g.38947724_39076333dup	Constitutional	Inherited	Benign
20C0593	AF	Fetal anomalies: Borderline NT at 11 wks (3.1mm), NT today: 1.75mm, Others: ECS positive: Wife: Usher syndrome type IIA/USH2A related disease. Husband: Usher syndrome type IIA/USH2A related disease, type IB/MYO7A related disease	seq[GRCh37] dup(11)(q14.1) chr11:g.78271438_78300113dup	Constitutional	Inherited	Benign
20C0593	AF	Fetal anomalies: Borderline NT at 11 wks (3.1mm), NT today: 1.75mm, Others: ECS positive: Wife: Usher syndrome type IIA/USH2A related disease. Husband: Usher syndrome type IIA/USH2A related disease, type IB/MYO7A related disease	seq[GRCh37] dup(16)(q23.1) chr16:g.74848612_75028862dup	Constitutional	Inherited	Benign
20C0171	AF	Non-invasive prenatal screening: increased in DNA 69.0 Mb on chromosome 8q (8q21.11-8q24.3)	seq[GRCh37] del(5)(p15.2) chr5:g.13250540_13302428del	Constitutional	Inherited	Benign
20C0171	AF	Non-invasive prenatal screening: increased in DNA 69.0 Mb on chromosome 8q (8q21.11-8q24.3)	seq[GRCh37] dup(6)(q22.1) chr6:g.117510399_117564401dup	Constitutional	Inherited	Benign
19C1607	AF	DCDA twin: Rt twin ARSA + Lt ventriculomegaly	seq[GRCh37] dup(17)(p11.2) chr17:g.16070782_16204307dup	Constitutional	Inherited	Benign
19C1607	AF	DCDA twin: Rt twin ARSA + Lt ventriculomegaly	seq[GRCh37] dup(19)(p13.3) chr19:g.730663_805553dup	Constitutional	Inherited	Benign
19C1607	AF	DCDA twin: Rt twin ARSA + Lt ventriculomegaly	seq[GRCh37] dup(X)(q28) chrX:g.148880449_149106876dup	Constitutional	Inherited	Benign
19C1607	AF	DCDA twin: Rt twin ARSA + Lt ventriculomegaly	seq[GRCh37] dup(Y)(p11.2) chrY:g.4602886_4712443dup	Constitutional	Inherited	Benign
19C1607	AF	DCDA twin: Rt twin ARSA + Lt ventriculomegaly	seq[GRCh37] dup(Y)(p11.2) chrY:g.6826351_7092632dup	Constitutional	Inherited	Benign
19C0828	AF	Non-invasive prenatal screening: SafeT21 express: elevation of DNA from a 4-Mb segment on chromosome 18q, spaning between 18q22.1-18q22.3 is detected	seq[GRCh37] dup(18)(p11.32) chr18:g.802658_913475dup	Constitutional	Inherited	Benign
19C0828	AF	Non-invasive prenatal screening: SafeT21 express: elevation of DNA from a 4-Mb segment on chromosome 18q, spaning between 18q22.1-18q22.3 is detected	seq[GRCh37] dup(18)(q22.1) chr18:g.65874129_69662666dup	Constitutional	Inherited	VUS
20C1831	AF	Non-invasive prenatal screening: SafeT21: decreased Xp chromosome	seq[GRCh37] del(3)(p26.1) chr3:g.5082320_5157348del	Constitutional	Inherited	Benign
20C1831	AF	Non-invasive prenatal screening: SafeT21: decreased Xp chromosome	seq[GRCh37] del(4)(q28.3) chr4:g.134921991_135192465del	Constitutional	Inherited	Benign
19C1125	AF	Non-invasive prenatal screening: NIFTY: high risk Monosomy 14	seq[GRCh37] del(14)(q12) chr14:g.27958050_28216134del	Constitutional	Inherited	Benign
19C0169	AF	Others: Early onset IUGR	seq[GRCh37] dup(6)(q12) chr6:g.63681312_63749491dup	Constitutional	Inherited	Benign
19C0618	CVS	Non-invasive prenatal screening: NIFTY: high risk for del(15q11.2-q13.1) 6.15Mb	seq[GRCh37] del(8)(p21.3) chr8:g.19975426_20047710del	Constitutional	Inherited	Benign
19C0885	AF	Non-invasive prenatal screening: NIFTY PRO: chr 18p deletion syndrome detected	seq[GRCh37] dup(10)(q26.3) chr10:g.135236317_135524661dup	Constitutional	Inherited	Benign
19C3345	AF	US: Absent nose bone at 21 weeks	seq[GRCh37] del(2)(q11.2) chr2:g.97713455_97860113del	Constitutional	Inherited	Benign
19C0920	CVS	SMA couple	seq[GRCh37] dup(12)(q21.1) chr12:g.72180013_72279880dup	Constitutional	Inherited	Benign
19C0920	CVS	SMA couple	seq[GRCh37] dup(22)(q12.1) chr22:g.28578900_28636499dup	Constitutional	Inherited	Benign
17C1248	AF	US: Fetal anomalies: Thick NF 6.09mm, anomalous retroesophageal Left BCV, absent DV	seq[GRCh37] del(14)(q31.3) chr14:g.86341811_86557911del	Constitutional	Inherited	Benign
17C1248	AF	US: Fetal anomalies: Thick NF 6.09mm, anomalous retroesophageal Left BCV, absent DV	seq[GRCh37] dup(17)(p11.2) chr17:g.21333659_21527733dup	Constitutional	Inherited	Benign
19C2808	AF	US: Fetal anomalies: Rt buttock lymphangioma, retroperitoneal lymphangioma	seq[GRCh37] dup(3)(q26.31) chr3:g.172252418_173104875dup	Constitutional	Inherited	Benign
19C2808	AF	US: Fetal anomalies: Rt buttock lymphangioma, retroperitoneal lymphangioma	seq[GRCh37] dup(10)(q26.11) chr10:g.120923175_121214128dup	Constitutional	Inherited	Benign
19C2665	AF	US: Fetal anomalies: Right multicystic dysplastic kidney	seq[GRCh37] dup(2)(p15) chr2:g.61383063_61457911dup	Constitutional	Inherited	Benign
19C2665	AF	US: Fetal anomalies: Right multicystic dysplastic kidney	seq[GRCh37] dup(5)(q22.1) chr5:g.110196315_110270691dup	Constitutional	Inherited	Benign
19C3008	CVS	US: Fetal anomalies: Fetal cystic hygroma (NT: 2.6mm)	seq[GRCh37] del(3)(q24) chr3:g.147718609_147778974del	Constitutional	Inherited	Benign
19C3008	CVS	US: Fetal anomalies: Fetal cystic hygroma (NT: 2.6mm)	seq[GRCh37] del(22)(q11.22) chr22:g.22313025_22580265del	Constitutional	Inherited	Benign
19C3360	AF	US: Fetal anomalies: severe hydrocephalus (Rt Vp 1.77cm, Lt Vp 2.27cm), ACC	seq[GRCh37] del(6)(q12) chr6:g.66468292_66617542del	Constitutional	Inherited	Benign
19C3360	AF	US: Fetal anomalies: severe hydrocephalus (Rt Vp 1.77cm, Lt Vp 2.27cm), ACC	seq[GRCh37] del(7)(q33) chr7:g.133238175_133417736del	Constitutional	Inherited	Benign
19C3360	AF	US: Fetal anomalies: severe hydrocephalus (Rt Vp 1.77cm, Lt Vp 2.27cm), ACC	seq[GRCh37] dup(16)(p13.13) chr16:g.12310523_12588330dup	Constitutional	Inherited	Benign
19C3360	AF	US: Fetal anomalies: severe hydrocephalus (Rt Vp 1.77cm, Lt Vp 2.27cm), ACC	seq[GRCh37] dup(16)(p13.12) chr16:g.13643687_14017066dup	Constitutional	Inherited	Benign
19C3360	AF	US: Fetal anomalies: severe hydrocephalus (Rt Vp 1.77cm, Lt Vp 2.27cm), ACC	seq[GRCh37] dup(16)(p13.12) chr16:g.14030076_14229210dup	Constitutional	Inherited	Benign
19C3360	AF	US: Fetal anomalies: severe hydrocephalus (Rt Vp 1.77cm, Lt Vp 2.27cm), ACC	seq[GRCh37] dup(X)(p22.31) chrX:g.8260562_8395729dup	Constitutional	Inherited	Benign
19C3360	AF	US: Fetal anomalies: severe hydrocephalus (Rt Vp 1.77cm, Lt Vp 2.27cm), ACC	seq[GRCh37] dup(X)(p22.31) chrX:g.8470229_8682525dup	Constitutional	Inherited	Benign
20C0912	CVS	Previous child/ pregnance with chr abn: Familial chr. abn.: previous pregnancy: amniocentesis showed XXX/XX mosaic & array CGH showed 3q29 microdeletion	seq[GRCh37] dup(X)(p22.12) chrX:g.19367331_19443285dup	Constitutional	Inherited	Benign
20C1829	AF	ad mat age, Non-invasive prenatal screening: Non-reportable result on microdeletions & advanced panel	seq[GRCh37] del(11)(p15.4) chr11:g.4802207_4908952del	Constitutional	Inherited	Benign
19C0213	CVS	US: thick NT 5.2mm	seq[GRCh37] dup(7)(q36.1) chr7:g.151819556_151953981dup	Constitutional	Inherited	Benign
20C0376	Cord Bld	US: Fetal anomalies: Hypoplastic left hearth	seq[GRCh37] del(2)(p22.2) chr2:g.38292090_38357474del	Constitutional	Inherited	Benign
20C0376	Cord Bld	US: Fetal anomalies: Hypoplastic left hearth	seq[GRCh37] del(2)(q37.3) chr2:g.242851990_243036953del	Constitutional	Inherited	Benign
20C0376	Cord Bld	US: Fetal anomalies: Hypoplastic left hearth	seq[GRCh37] dup(Y)(q11.21) chrY:g.14021041_14490201dup	Constitutional	Inherited	Benign
19C1681	AF	US: Fetal anomalies: pericardial effusion, positive Down screening risk: 1:42	seq[GRCh37] del(3)(p21.1) chr3:g.54256842_54330085del	Constitutional	Inherited	Benign
19C1681	AF	US: Fetal anomalies: pericardial effusion, positive Down screening risk: 1:42	seq[GRCh37] dup(13)(q21.2) chr13:g.61749841_61811496dup	Constitutional	Inherited	Benign
19C1194	AF	US: Fetal anomalies: small cerebellum, measured at 7 percentile of normal	seq[GRCh37] del(2)(p21) chr2:g.47494688_47578982del	Constitutional	Inherited	Benign
19C1194	AF	US: Fetal anomalies: small cerebellum, measured at 7 percentile of normal	seq[GRCh37] dup(4)(q22.1) chr4:g.91554575_91649048dup	Constitutional	Inherited	Benign
19C1194	AF	US: Fetal anomalies: small cerebellum, measured at 7 percentile of normal	seq[GRCh37] dup(19)(p13.3) chr19:g.61245_352993dup	Constitutional	Inherited	Benign
19C0517	CVS	US: NT 4.7mm	seq[GRCh37] del(8)(p23.2) chr8:g.3511334_3587374del	Constitutional	Inherited	Benign
20C0064	AF	Others: Maternal Fragile X intermediate carrier (CGG 30/49)	seq[GRCh37] dup(5)(p14.3) chr5:g.20977688_21064025dup	Constitutional	Inherited	Benign
20C0064	AF	Others: Maternal Fragile X intermediate carrier (CGG 30/49)	seq[GRCh37] del(9)(p23) chr9:g.12164880_12236038del	Constitutional	Inherited	Benign
19C3305	AF	Non-invasive prenatal screening: high risk for trisomy 13	seq[GRCh37] dup(4)(q34.3) chr4:g.179772164_180827697dup	Constitutional	Inherited	Benign
19C3305	AF	Non-invasive prenatal screening: high risk for trisomy 13	seq[GRCh37] dup(Y)(p11.2) chrY:g.4489876_4716707dup	Constitutional	Inherited	Benign
19C3305	AF	Non-invasive prenatal screening: high risk for trisomy 13	seq[GRCh37] dup(Y)(p11.2) chrY:g.6826351_7092632dup	Constitutional	Inherited	Benign
19C3077	AF	Non-invasive prenatal screening: SafeT21: Borderline reduction in chrromosome X, USG: female	seq[GRCh37] del(6)(p21.2) chr6:g.39486075_39608431del	Constitutional	Inherited	Benign
19C3077	AF	Non-invasive prenatal screening: SafeT21: Borderline reduction in chrromosome X, USG: female	seq[GRCh37] del(15)(q13.2) chr15:g.30448552_31039658del	Constitutional	Inherited	Benign
19C3077	AF	Non-invasive prenatal screening: SafeT21: Borderline reduction in chrromosome X, USG: female	seq[GRCh37] del(16)(q23.2) chr16:g.80934118_81009754del	Constitutional	Inherited	Benign
19C3077	AF	Non-invasive prenatal screening: SafeT21: Borderline reduction in chrromosome X, USG: female	seq[GRCh37] dup(17)(p13.2) chr17:g.4437191_4516248dup	Constitutional	Inherited	Benign
19C0944	AF	US: Fetal anomalies: Absent nasal bone	seq[GRCh37] dup(1)(q32.1) chr1:g.200673673_200786211dup	Constitutional	Inherited	Benign
19C2425	AF	US: Fetal anomalies: Right twin has left microtia grade 3	seq[GRCh37] del(6)(q26) chr6:g.162636547_162766170del	Constitutional	Inherited	Benign
19C2425	AF	US: Fetal anomalies: Right twin has left microtia grade 3	seq[GRCh37] dup(12)(q11q12) chr12:g.37918294_38570749dup	Constitutional	Inherited	Benign
19C2425	AF	US: Fetal anomalies: Right twin has left microtia grade 3	seq[GRCh37] dup(19)(p12) chr19:g.22217103_22429042dup	Constitutional	Inherited	Benign
19C2055	AF	US: aberrant right subclavian artery	seq[GRCh37] del(7)(p14.1) chr7:g.38740168_38785649del	Constitutional	Inherited	Benign
19C2055	AF	US: aberrant right subclavian artery	seq[GRCh37] del(9)(p21.1) chr9:g.28782983_28852982del	Constitutional	Inherited	Benign
19C2055	AF	US: aberrant right subclavian artery	seq[GRCh37] del(20)(p11.23) chr20:g.19096926_19146906del	Constitutional	Inherited	Benign
19C0390	AF	ad mat age; Non-invasive prenatal screening: 22q11.21 (positive)	seq[GRCh37] del(4)(q23) chr4:g.100325798_100746436del	Constitutional	Inherited	Benign
19C0390	AF	ad mat age; Non-invasive prenatal screening: 22q11.21 (positive)	seq[GRCh37] del(9)(p23) chr9:g.12331809_12373441del	Constitutional	Inherited	Benign
19C0390	AF	ad mat age; Non-invasive prenatal screening: 22q11.21 (positive)	seq[GRCh37] dup(12)(q14.2) chr12:g.63946689_64094861dup	Constitutional	Inherited	Benign
19C0390	AF	ad mat age; Non-invasive prenatal screening: 22q11.21 (positive)	seq[GRCh37] del(22)(q11.21) chr22:g.18912979_21443877del	Constitutional	Inherited	P/LP
20C0338	CVS	US: Thick NT 3.6mm	seq[GRCh37] dup(1)(q31.3) chr1:g.197081188_197130856dup	Constitutional	Inherited	Benign
20C0338	CVS	US: Thick NT 3.6mm	seq[GRCh37] dup(X)(p11.4) chrX:g.41246759_41368588dup	Constitutional	Inherited	Benign
19C1306	AF	US: Fetal anomalies: Fetal right cleft lip, right alveolar ridge	seq[GRCh37] dup(15)(q21.3) chr15:g.54862920_54960965dup	Constitutional	Inherited	Benign
19C1306	AF	US: Fetal anomalies: Fetal right cleft lip, right alveolar ridge	seq[GRCh37] dup(17)(11.2) chr17:g.21514998_22217076dup	Constitutional	Inherited	Benign
19C1306	AF	US: Fetal anomalies: Fetal right cleft lip, right alveolar ridge	seq[GRCh37] del(21)(q21.2) chr21:g.24056401_24123080del	Constitutional	Inherited	Benign
20C0583	AF	Non-invasive prenatal screening: positive for 45X	seq[GRCh37] dup(19)(q11) chr19:g.27878059_28541461dup	Constitutional	Inherited	Benign
20C0873	CVS	β thal couple	seq[GRCh37] dup(8)(23.1) chr8:g.11653468_11836610dup	Constitutional	Inherited	Benign
19C1672	CVS	Translocation carrier: t(4;11)(p14;q14)	seq[GRCh37] del(6)(11.2) chr6:g.57522863_57927676del	Constitutional	Inherited	Benign
19C1672	CVS	Translocation carrier: t(4;11)(p14;q14)	seq[GRCh37] dup(10)(12.1) chr10:g.28416993_28865296dup	Constitutional	Inherited	VUS
19C1672	CVS	Translocation carrier: t(4;11)(p14;q14)	seq[GRCh37] del(13)(q21.1) chr13:g.55437104_55640273del	Constitutional	Inherited	Benign
19C1672	CVS	Translocation carrier: t(4;11)(p14;q14)	seq[GRCh37] dup(13)(q22.3) chr13:g.77491819_77556306dup	Constitutional	Inherited	Benign
19C1803	AF	NT 3.2mm, left cleft lip & cleft palate, ambiguous genitalia, agenesis of cerebellar vermis ? Hypertelorism; positive Down screening: Risk: 1:4, T13 & T18 +ve	seq[GRCh37] dup(11)(q11) chr11:g.55596069_55688785dup	Constitutional	Inherited	Benign
19C1882	AF	Non-invasive prenatal screening: Private NIPT: NIFTYpro shows negative; fetal US: bilateral CPC, microcephaly, ?small lens+, ?congenital cataract, microphthalmia, TOP at 23+ weeks	seq[GRCh37] dup(10)(15.2) chr10:g.3090055_3142191dup	Constitutional	Inherited	Benign
19C2956	AF	Previous child/ pregnancy with chr. abn.: Mosaicism tetrasomy 9P	seq[GRCh37] del(6)(22.1) chr6:g.27551171_27726217del	Constitutional	Inherited	Benign
19C2956	AF	Previous child/ pregnancy with chr. abn.: Mosaicism tetrasomy 9P	seq[GRCh37] del(16)(q23.3) chr16:g.82251796_82315810del	Constitutional	Inherited	Benign
20C1766	AF	US: Fetal anomalies: Cleft lip (isolated)	seq[GRCh37] del(4)(q33) chr4:g.171376794_171492424del	Constitutional	Inherited	Benign
20C1766	AF	US: Fetal anomalies: Cleft lip (isolated)	seq[GRCh37] del(5)(q21.3) chr5:g.105628478_105671938del	Constitutional	Inherited	Benign
20C1766	AF	US: Fetal anomalies: Cleft lip (isolated)	seq[GRCh37] dup(14)(q23.3) chr14:g.67788132_67845499dup	Constitutional	Inherited	Benign
20C1766	AF	US: Fetal anomalies: Cleft lip (isolated)	seq[GRCh37] del(20)(q11.21) chr20:g.29421098_29506024del	Constitutional	Inherited	Benign
20C1766	AF	US: Fetal anomalies: Cleft lip (isolated)	seq[GRCh37] dup(X)(22.31) chrX:g.8436308_8721905dup	Constitutional	Inherited	Benign
20C0948	AF	USG today at 16+4 wk showed borderline ventriculomegaly, ? Agenesis of corpus callosum, Non-invasive prenatal screening: increased DNA from 33 Mb segment on chromosome 8q, between 8q22.1-8q24.21	seq[GRCh37] dup(1)(q43) chr1:g.241666360_241747809dup	Constitutional	Inherited	Benign
19C2191	AF	Non-invasive prenatal screening: SafeT21: high risk T21	seq[GRCh37] dup(X)(q21.2) chrX:g.85711080_85787667dup	Constitutional	Inherited	Benign
19C1781	CVS	Others: β thal couple	seq[GRCh37] dup(3)(q26.1) chr3:g.165445933_165518271dup	Constitutional	Inherited	Benign
19C1781	CVS	Others: β thal couple	seq[GRCh37] dup(15)(q21.3) chr15:g.53786273_53833424dup	Constitutional	Inherited	Benign
17C1183	CVS	Anxiety	seq[GRCh37] dup(7)(q11.21) chr7:g.63761381_63975949dup	Constitutional	Inherited	Benign
17C1183	CVS	Anxiety	seq[GRCh37] del(7)(q36.2) chr7:g.153892493_154017000del	Constitutional	Inherited	Benign
20C0411	AF	Previous child/ pregnancy with chr abn: 46XY/ 45XO, mixed gonadal dysgenesis	seq[GRCh37] del(3)(q22.1) chr3:g.130176383_130252517del	Constitutional	Inherited	Benign
20C0411	AF	Previous child/ pregnancy with chr abn: 46XY/ 45XO, mixed gonadal dysgenesis	seq[GRCh37] dup(22)(q12.2) chr22:g.29732134_29811319dup	Constitutional	Inherited	Benign
19C1775	AF	US: Fetal anomalies: cystic hygroma	seq[GRCh37] dup(17)(q25.3) chr17:g.77862425_78276398dup	Constitutional	Inherited	Benign
19C3590	AF	US: Fetal anomalies: mild bilateral ventriculomegaly, polyhydramnios	seq[GRCh37] del(7)(12.1) chr7:g.53460935_53593368del	Constitutional	Inherited	Benign
19C3590	AF	US: Fetal anomalies: mild bilateral ventriculomegaly, polyhydramnios	seq[GRCh37] del(8)(23.1) chr8:g.9980771_10059939del	Constitutional	Inherited	Benign
19C3590	AF	US: Fetal anomalies: mild bilateral ventriculomegaly, polyhydramnios	seq[GRCh37] dup(10)(q11.21) chr10:g.45218864_45361338dup	Constitutional	Inherited	Benign
19C3590	AF	US: Fetal anomalies: mild bilateral ventriculomegaly, polyhydramnios	seq[GRCh37] dup(11)(q13.4) chr11:g.71845485_71881862dup	Constitutional	Inherited	Benign
19C3590	AF	US: Fetal anomalies: mild bilateral ventriculomegaly, polyhydramnios	seq[GRCh37] dup(20)(q12) chr20:g.37834212_37977419dup	Constitutional	Inherited	Benign
19C0695	CVS	US: NT 5.7mm	seq[GRCh37] dup(11)(15.1) chr11:g.17760642_18078531dup	Constitutional	Inherited	VUS
19C0695	CVS	US: NT 5.7mm	seq[GRCh37] del(12)(q21.2) chr12:g.76513467_76567755del	Constitutional	Inherited	Benign
19C0695	CVS	US: NT 5.7mm	seq[GRCh37] dup(19)(q13.33) chr19:g.50481945_50570859dup	Constitutional	Inherited	Benign
20C1114	AF	US: Fetal anomalies: Isolated omphalocele	seq[GRCh37] del(5)(q22.1) chr5:g.109865712_109991749del	Constitutional	Inherited	Benign
20C0842	AF	Non-invasive prenatal screening: 4p15.1 deletion	seq[GRCh37] del(4)(15.1) chr4:g.31613878_34217812del	Constitutional	Inherited	Benign
19C2058	AF	US: Fetal anomalies: early IUGR	seq[GRCh37] dup(4)(q35.2) chr4:g.188943463_189996318dup	Constitutional	Inherited	Benign
19C2058	AF	US: Fetal anomalies: early IUGR	seq[GRCh37] del(6)(q16.1) chr6:g.95973294_96047479del	Constitutional	Inherited	Benign
19C2058	AF	US: Fetal anomalies: early IUGR	seq[GRCh37] del(13)(q21.32) chr13:g.65994030_66165648del	Constitutional	Inherited	Benign
19C2058	AF	US: Fetal anomalies: early IUGR	seq[GRCh37] dup(X)(11.21) chrX:g.57449354_57503541dup	Constitutional	Inherited	Benign
19C1534	AF	Non-invasive prenatal screening: del(Xq13.2-q24,44.39M)	seq[GRCh37] dup(5)(q14.3) chr5:g.85337144_85391202dup	Constitutional	Inherited	Benign
19C1534	AF	Non-invasive prenatal screening: del(Xq13.2-q24,44.39M)	seq[GRCh37] dup(19)(p12p11) chr19:g.23871152_24525444dup	Constitutional	Inherited	Benign
19C3266	AF	US: Fetal anomalies: renal cysts	seq[GRCh37] dup(7)(q35) chr7:g.145611152_145629053dup	Constitutional	Inherited	Benign
19C1826	AF	Non-invasive prenatal screening: Failed NIFTY & Panorama	seq[GRCh37] dup(6)(q13) chr6:g.71013012_71198983dup	Constitutional	Inherited	Benign
19C1826	AF	Non-invasive prenatal screening: Failed NIFTY & Panorama	seq[GRCh37] dup(X)(q28) chrX:g.152350186_152585106dup	Constitutional	Inherited	Benign
19C2358	AF	US: Fetal anomalies: aberrant right subclavian artery, unilateral cystic dysplastic kidney, ? small ear, increased liquor. Non-invasive prenetal screening: 1st sample T21 showed borderline abnormal microdeletion, 2nd sample T21 normal.	seq[GRCh37] del(1)(p33) chr1:g.49837714_49884432del	Constitutional	Inherited	Benign
19C2358	AF	US: Fetal anomalies: aberrant right subclavian artery, unilateral cystic dysplastic kidney, ? small ear, increased liquor. Non-invasive prenetal screening: 1st sample T21 showed borderline abnormal microdeletion, 2nd sample T21 normal.	seq[GRCh37] dup(11)(q13.2) chr11:g.67506119_67730414dup	Constitutional	Inherited	Benign
20C0390	CVS	US: Fetal anomalies: NT 0.39cm	seq[GRCh37] del(10)(p15.3) chr10:g.2329593_2412304del	Constitutional	Inherited	Benign
19C1685	AF	USG showed male genitalia; positive Down screening risk: 1:30; Non-invasive prenatal screening: 45,XO	seq[GRCh37] dup(19)(q12) chr19:g.29222045_29808184dup	Constitutional	Inherited	Benign
19C1685	AF	USG showed male genitalia; positive Down screening risk: 1:30; Non-invasive prenatal screening: 45,XO	seq[GRCh37] del(20)(p12.1) chr20:g.14749453_14798891del	Constitutional	Inherited	Benign
19C3543	AF	ad mat age; Non-invasive prenatal screening: Reduction of DNA from a 4.0 Mb segment on chromosome 16p, spanning between 16p13.1-16p12.3 is detected	seq[GRCh37] dup(1)(q41) chr1:g.219577267_220412521dup	Constitutional	Inherited	VUS
19C3543	AF	ad mat age; Non-invasive prenatal screening: Reduction of DNA from a 4.0 Mb segment on chromosome 16p, spanning between 16p13.1-16p12.3 is detected	seq[GRCh37] del(6)(q11.1) chr6:g.62184491_62249455del	Constitutional	Inherited	Benign
19C3543	AF	ad mat age; Non-invasive prenatal screening: Reduction of DNA from a 4.0 Mb segment on chromosome 16p, spanning between 16p13.1-16p12.3 is detected	seq[GRCh37] del(8)(q12.3) chr8:g.63278917_63326104del	Constitutional	Inherited	Benign
19C3543	AF	ad mat age; Non-invasive prenatal screening: Reduction of DNA from a 4.0 Mb segment on chromosome 16p, spanning between 16p13.1-16p12.3 is detected	seq[GRCh37] del(11)(p14.3) chr11:g.24193101_24243929del	Constitutional	Inherited	Benign
19C2142	AF	US: NT 4.2mm	seq[GRCh37] dup(10)(p12.1) chr10:g.27211819_27427426dup	Constitutional	Inherited	Benign
19C0818	Cord Bld	US: Fetal anomalies: fetal anaemia	seq[GRCh37] del(3)(q13.31) chr3:g.116456120_116559561del	Constitutional	Inherited	Benign
19C0818	Cord Bld	US: Fetal anomalies: fetal anaemia	seq[GRCh37] dup(7)(q21.2) chr7:g.91226452_91271684dup	Constitutional	Inherited	Benign
19C0818	Cord Bld	US: Fetal anomalies: fetal anaemia	seq[GRCh37] dup(13)(q34) chr13:g.113665292_113783759dup	Constitutional	Inherited	Benign
19C0818	Cord Bld	US: Fetal anomalies: fetal anaemia	seq[GRCh37] del(15)(q15.1q15.2) chr15:g.42795048_42916681del	Constitutional	Inherited	Benign
19C0818	Cord Bld	US: Fetal anomalies: fetal anaemia	seq[GRCh37] del(20)(q11.21) chr20:g.29423424_29598146del	Constitutional	Inherited	Benign
19C0909	AF	Maternal anxiety	seq[GRCh37] dup(3)(q27.3) chr3:g.186506171_186682088dup	Constitutional	Inherited	Benign
19C0909	AF	Maternal anxiety	seq[GRCh37] del(16)(q23.1) chr16:g.78192169_78245528del	Constitutional	Inherited	Benign
19C0909	AF	Maternal anxiety	seq[GRCh37] dup(22)(q12.3) chr22:g.36917213_36967862dup	Constitutional	Inherited	Benign
19C3665	CVS	US: DCTA triplets; MC pair DSS1 Low risk, left singleton screened T21 positive 1:179, plan for fetoreduction	seq[GRCh37] dup(11)(q22.1) chr11:g.101643750_101873144dup	Constitutional	Inherited	Benign
19C0485	CVS	US: Fetal anomalies: NT 5.5mm	seq[GRCh37] del(2)(q11.2) chr2:g.97734342_98070117del	Constitutional	Inherited	Benign
19C0485	CVS	US: Fetal anomalies: NT 5.5mm	seq[GRCh37] del(8)(q12.3) chr8:g.63269484_63335628del	Constitutional	Inherited	Benign
19C0485	CVS	US: Fetal anomalies: NT 5.5mm	seq[GRCh37] del(15)(q11.2) chr15:g.23423791_23707332del	Constitutional	Inherited	Benign
19C0485	CVS	US: Fetal anomalies: NT 5.5mm	seq[GRCh37] dup(X)(q21.31) chrX:g.90211820_90449434dup	Constitutional	Inherited	Benign
19C2798	AF	Non-invasive prenatal screening: NIFTY suspects trisomy 11, USG->normal	seq[GRCh37] dup(4)(q23) chr4:g.99155675_99221521dup	Constitutional	Inherited	Benign
19C2798	AF	Non-invasive prenatal screening: NIFTY suspects trisomy 11, USG->normal	seq[GRCh37] dup(12)(q24.33) chr12:g.132061509_132170041dup	Constitutional	Inherited	Benign
19C0691	CVS	US: Fetal anomalies: Thick N.T. with gross cystic hygroma, Safe T21 express normal	seq[GRCh37] dup(1)(p31.1) chr1:g.74501730_74710957dup	Constitutional	Inherited	Benign
19C0691	CVS	US: Fetal anomalies: Thick N.T. with gross cystic hygroma, Safe T21 express normal	seq[GRCh37] del(7)(q36.1) chr7:g.150313892_150493992del	Constitutional	Inherited	Benign
19C0691	CVS	US: Fetal anomalies: Thick N.T. with gross cystic hygroma, Safe T21 express normal	seq[GRCh37] dup(10)(p11.21) chr10:g.35373686_35470596dup	Constitutional	Inherited	Benign
19C1688	AF	US: Fetal anomalies: fused kidney, crossed renal ectopia	seq[GRCh37] del(6)(p21.2) chr6:g.40064538_40105558del	Constitutional	Inherited	Benign
19C1688	AF	US: Fetal anomalies: fused kidney, crossed renal ectopia	seq[GRCh37] dup(12)(p11.21) chr12:g.31256187_31408806dup	Constitutional	Inherited	Benign
19C1688	AF	US: Fetal anomalies: fused kidney, crossed renal ectopia	seq[GRCh37] dup(16)(p11.2) chr16:g.34467545_34747133dup	Constitutional	Inherited	Benign
20C0516	CVS	US: Fetal anomalies: thick NT 4.2mm	seq[GRCh37] del(2)(p16.1) chr2:g.57309971_57366712del	Constitutional	Inherited	Benign
20C0516	CVS	US: Fetal anomalies: thick NT 4.2mm	seq[GRCh37] dup(7)(q22.3) chr7:g.105021415_105186704dup	Constitutional	Inherited	Benign
20C0516	CVS	US: Fetal anomalies: thick NT 4.2mm	seq[GRCh37] dup(8)(p22) chr8:g.13197205_13244968dup	Constitutional	Inherited	Benign
20C0516	CVS	US: Fetal anomalies: thick NT 4.2mm	seq[GRCh37] dup(9)(p22.3) chr9:g.15272863_15323671dup	Constitutional	Inherited	Benign
20C0777	AF	US: Fetal anomalies: cleft lips and palate	seq[GRCh37] dup(6)(q27) chr6:g.168515101_168573448dup	Constitutional	Inherited	Benign
20C0777	AF	US: Fetal anomalies: cleft lips and palate	seq[GRCh37] dup(X)(q27.2) chrX:g.141615557_141667894dup	Constitutional	Inherited	Benign
19C3464	AF	US: Fetal anomalies: SUA, megacystis, NT 3.7 mm, PS, MR, TR, echogenic bowel, hydrops	seq[GRCh37] dup(3)(q22.3) chr3:g.137172692_137352362dup	Constitutional	Inherited	Benign
20C0756	AF	US: Fetal anomalies: ventriculomegaly right 10-11mm	seq[GRCh37] dup(4)(q35.2) chr4:g.188830759_189917060dup	Constitutional	Inherited	Benign
20C0756	AF	US: Fetal anomalies: ventriculomegaly right 10-11mm	seq[GRCh37] del(5)(q11.2) chr5:g.58755000_58801000del	Constitutional	Inherited	Benign
20C0756	AF	US: Fetal anomalies: ventriculomegaly right 10-11mm	seq[GRCh37] dup(5)(q13.2) chr5:g.68745017_68826337dup	Constitutional	Inherited	Benign
20C0756	AF	US: Fetal anomalies: ventriculomegaly right 10-11mm	seq[GRCh37] del(8)(p11.21) chr8:g.42305781_42400300del	Constitutional	Inherited	VUS
20C0756	AF	US: Fetal anomalies: ventriculomegaly right 10-11mm	seq[GRCh37] dup(10)(p12.1) chr10:g.25813331_26184763dup	Constitutional	Inherited	Benign
19C1313	AF	US: Fetal anomalies: Fetal pulmonary stenosis	seq[GRCh37] dup(2)(q31.3) chr2:g.182273254_182386806dup	Constitutional	Inherited	Benign
19C1313	AF	US: Fetal anomalies: Fetal pulmonary stenosis	seq[GRCh37] dup(8)(q13.3) chr8:g.71201693_71244936dup	Constitutional	Inherited	Benign
19C1313	AF	US: Fetal anomalies: Fetal pulmonary stenosis	seq[GRCh37] dup(12)(p11.1) chr12:g.34379223_34477832dup	Constitutional	Inherited	Benign
19C1313	AF	US: Fetal anomalies: Fetal pulmonary stenosis	seq[GRCh37] del(17)(q22) chr17:g.50638079_50698382del	Constitutional	Inherited	Benign
20C0479	AF	Fetal anomalies: NT 3.4mm; Previous child/ pregnancy with chr abn: (baby) hearing impairment GJB2 mutation	seq[GRCh37] dup(1)(q24.3) chr1:g.171700811_171956781dup	Constitutional	Inherited	VUS
20C0479	AF	Fetal anomalies: NT 3.4mm; Previous child/ pregnancy with chr abn: (baby) hearing impairment GJB2 mutation	seq[GRCh37] del(3)(p24.1) chr3:g.30268912_30344722del	Constitutional	Inherited	Benign
20C0479	AF	Fetal anomalies: NT 3.4mm; Previous child/ pregnancy with chr abn: (baby) hearing impairment GJB2 mutation	seq[GRCh37] dup(8)(q24.3) chr8:g.145839137_145981805dup	Constitutional	Inherited	Benign
20C0479	AF	Fetal anomalies: NT 3.4mm; Previous child/ pregnancy with chr abn: (baby) hearing impairment GJB2 mutation	seq[GRCh37] dup(14)(q22.1) chr14:g.53558999_53705874dup	Constitutional	Inherited	Benign
19C2853	AF	ad mat age, Others: IVF, PGS, Showed 30% mosaicism for 10p15.3p11.21x2~3 chromosomes	seq[GRCh37] del(19)(p13.2) chr19:g.6954649_7063482del	Constitutional	Inherited	Benign
19C0330	AF	US: Others: USG at 21 week: Dilated Bowel Loops up to 1 cm, Non-invasive prenatal screening: NIFTY negative	seq[GRCh37] dup(14)(q21.3) chr14:g.48260204_48410457dup	Constitutional	Inherited	Benign
19C1673	CVS	US: NT 3.6mm at 12week	seq[GRCh37] del(4)(p16.3) chr4:g.68618_224413del	Constitutional	Inherited	Benign
19C1673	CVS	US: NT 3.6mm at 12week	seq[GRCh37] del(4)(p16.1) chr4:g.11013991_11059994del	Constitutional	Inherited	Benign
19C1673	CVS	US: NT 3.6mm at 12week	seq[GRCh37] dup(12)(q12) chr12:g.41720741_41909232dup	Constitutional	Inherited	Benign
19C2579	CVS	US: fetal anomalies: NT 3.6mm	seq[GRCh37] del(8)(p23.2) chr8:g.5673100_5869829del	Constitutional	Inherited	Benign
19C2579	CVS	US: fetal anomalies: NT 3.6mm	seq[GRCh37] del(8)(p23.1) chr8:g.10442630_10487248del	Constitutional	Inherited	Benign
19C2579	CVS	US: fetal anomalies: NT 3.6mm	seq[GRCh37] dup(11)(p12) chr11:g.38943335_39068213dup	Constitutional	Inherited	Benign
20C0741	AF	US: Fetal anomalies: Agenesis of corpus callosum	seq[GRCh37] del(2)(q37.3) chr2:g.242849708_243033512del	Constitutional	Inherited	Benign
20C0741	AF	US: Fetal anomalies: Agenesis of corpus callosum	seq[GRCh37] dup(4)(q13.1) chr4:g.63407927_63462354dup	Constitutional	Inherited	Benign
20C0741	AF	US: Fetal anomalies: Agenesis of corpus callosum	seq[GRCh37] del(9)(p21.1) chr9:g.28583597_28761668del	Constitutional	Inherited	Benign
19C2382	CVS	ad mat age, US: NT 3.7mm	seq[GRCh37] dup(6)(q26) chr6:g.162642797_163221722dup	Constitutional	Inherited	Benign
19C2382	CVS	ad mat age, US: NT 3.7mm	seq[GRCh37] del(10)(q22.1) chr10:g.74238136_74337870del	Constitutional	Inherited	Benign
19C2382	CVS	ad mat age, US: NT 3.7mm	seq[GRCh37] dup(16)(p12.2) chr16:g.21970795_22474023dup	Constitutional	Inherited	Benign
19C2365	AF	Previous child/ pregnancy with chr abn: Previous pregnancy with Williams syndrome, both patient and husband are GJB2 carrier.	seq[GRCh37] dup(2)(p25.3) chr2:g.316891_846255dup	Constitutional	Inherited	Benign
19C2365	AF	Previous child/ pregnancy with chr abn: Previous pregnancy with Williams syndrome, both patient and husband are GJB2 carrier.	seq[GRCh37] dup(7)(p21.3) chr7:g.10862905_11566874dup	Constitutional	Inherited	Benign
20C0495	AF	US: Fetal anomalies: Fetal ventriculomegaly	seq[GRCh37] del(6)(p22.1) chr6:g.27550183_27728567del	Constitutional	Inherited	Benign
20C0495	AF	US: Fetal anomalies: Fetal ventriculomegaly	seq[GRCh37] del(7)(p12.1) chr7:g.53460935_53593368del	Constitutional	Inherited	Benign
20C0495	AF	US: Fetal anomalies: Fetal ventriculomegaly	seq[GRCh37] dup(Y)(p11.2) chrY:g.5907134_6096759dup	Constitutional	Inherited	Benign
20C0495	AF	US: Fetal anomalies: Fetal ventriculomegaly	seq[GRCh37] dup(Y)(p11.2) chrY:g.9640305_9757393dup	Constitutional	Inherited	Benign
19C2293	AF	Please check for possible mental retardation, neurological disorders and congenital heart defects and cancers	seq[GRCh37] del(2)(q11.2) chr2:g.97707733_98213969del	Constitutional	Inherited	Benign
19C2293	AF	Please check for possible mental retardation, neurological disorders and congenital heart defects and cancers	seq[GRCh37] del(7)(q35) chr7:g.143390704_143990947del	Constitutional	Inherited	Benign
19C2293	AF	Please check for possible mental retardation, neurological disorders and congenital heart defects and cancers	seq[GRCh37] dup(16)(p12.2) chr16:g.21566403_21741786dup	Constitutional	Inherited	Benign
20C0409	CVS	Non-invasive prenatal screening: high risk of T21	seq[GRCh37] del(7)(q31.33) chr7:g.124819515_124867484del	Constitutional	Inherited	Benign
20C0409	CVS	Non-invasive prenatal screening: high risk of T21	seq[GRCh37] dup(19)(p13.3) chr19:g.240637_331541dup	Constitutional	Inherited	Benign
20C0409	CVS	Non-invasive prenatal screening: high risk of T21	seq[GRCh37] dup(X)(p22.2) chrX:g.15594101_15738533dup	Constitutional	Inherited	Benign
20C1327	AF	US: Fetal anomalies: bilateral dilated ventricles of brain, hypoplasia of cerebellum	seq[GRCh37] dup(3)(p12.1) chr3:g.85423311_85453859dup	Constitutional	Inherited	Benign
20C1327	AF	US: Fetal anomalies: bilateral dilated ventricles of brain, hypoplasia of cerebellum	seq[GRCh37] dup(10)(p14) chr10:g.11809169_12651523dup	Constitutional	Inherited	Benign
20C1327	AF	US: Fetal anomalies: bilateral dilated ventricles of brain, hypoplasia of cerebellum	seq[GRCh37] dup(12)(q24.32) chr12:g.128183138_128301246dup	Constitutional	Inherited	Benign
20C0315	AF	Took methotrexate 2/12 before conception	seq[GRCh37] del(21)(q22.12) chr21:g.36840292_36959963del	Constitutional	Inherited	Benign
20C0315	AF	Took methotrexate 2/12 before conception	seq[GRCh37] dup(X)(p22.32) chrX:g.5897499_6443708dup	Constitutional	Inherited	Benign
20C0315	AF	Took methotrexate 2/12 before conception	seq[GRCh37] dup(X)(p22.31) chrX:g.8132774_8247286dup	Constitutional	Inherited	Benign
19C3606	AF	Non-invasive prenatal screening: mild reduction in Chromosome X DNA detected	seq[GRCh37] del(1)(p31.3) chr1:g.66537771_66633166del	Constitutional	Inherited	Benign
19C3606	AF	Non-invasive prenatal screening: mild reduction in Chromosome X DNA detected	seq[GRCh37] dup(4)(q13.3) chr4:g.74177172_74598182dup	Constitutional	Inherited	Benign
20C0339	AF	US: Fetal anomalies: fetal right arotic arch, Non- invasive prenatal screening: China: 22q deletion	seq[GRCh37] del(11)(q25) chr11:g.134153195_134211023del	Constitutional	Inherited	Benign
19C1657	AF	US: Fetal anomalies: sacral spina bifida	seq[GRCh37] del(3)(p21.1) chr3:g.54206100_54330372del	Constitutional	Inherited	Benign
19C0846	AF	ARSA USG: fetal aberrant right subclavian artery	seq[GRCh37] dup(2)(q21.1) chr2:g.130848365_131290677dup	Constitutional	Inherited	Benign
19C0846	AF	ARSA USG: fetal aberrant right subclavian artery	seq[GRCh37] dup(7)(q21.2) chr7:g.91210574_91274096dup	Constitutional	Inherited	Benign
20C0137	AF	US: Fetal anomalies: DV-systemic shunt	seq[GRCh37] dup(8)(p23.2) chr8:g.5411021_5453316dup	Constitutional	Inherited	Benign
19C2971	CVS	US: Fetal anomalies: NT 4mm	seq[GRCh37] del(6)(q24.1) chr6:g.140662420_140763835del	Constitutional	Inherited	Benign
20C0285	AF	Non-invasive prenatal screening: 22q11 deletion	seq[GRCh37] dup(12)(q24.33) chr12:g.132057529_132160591dup	Constitutional	Inherited	Benign
20C0285	AF	Non-invasive prenatal screening: 22q11 deletion	seq[GRCh37] del(16)(p13.2) chr16:g.9678147_9733109del	Constitutional	Inherited	Benign
20C0285	AF	Non-invasive prenatal screening: 22q11 deletion	seq[GRCh37] dup(22)(q11.21) chr22:g.20668378_21521916dup	Constitutional	Inherited	Benign
19C1802	AF	positive Down screening risk: 1:50	seq[GRCh37] del(8)(p23.3) chr8:g.10134_10202794del	Constitutional	Inherited	P/LP
19C1802	AF	positive Down screening risk: 1:50	seq[GRCh37] del(12)(q24.23) chr12:g.119235527_119292135del	Constitutional	Inherited	Benign
19C1802	AF	positive Down screening risk: 1:50	seq[GRCh37] dup(18)(q21.1) chr18:g.44516141_44541999dup	Constitutional	Inherited	Benign
20C0034	AF	Non-invasive prenatal screening: abnormal sex chromosome, low level of Y	seq[GRCh37] dup(5)(q13.1) chr5:g.67120278_67192295dup	Constitutional	Inherited	Benign
20C0034	AF	Non-invasive prenatal screening: abnormal sex chromosome, low level of Y	seq[GRCh37] del(11)(q14.3) chr11:g.90090491_90145659del	Constitutional	Inherited	Benign
20C1319	AF	Non-invasive prenatal screening: low fetal fraction	seq[GRCh37] dup(10)(q26.3) chr10:g.133304210_133435165dup	Constitutional	Inherited	Benign
20C1319	AF	Non-invasive prenatal screening: low fetal fraction	seq[GRCh37] dup(11)(q14.1) chr11:g.83358687_83424170dup	Constitutional	Inherited	Benign
20C1319	AF	Non-invasive prenatal screening: low fetal fraction	seq[GRCh37] dup(15)(q21.1) chr15:g.45152735_45735090dup	Constitutional	Inherited	Benign
20C0515	AF	Non-invasive prenatal screening: increase DNA from chromosome 8	seq[GRCh37] del(4)(q28.1) chr4:g.127018014_127160432del	Constitutional	Inherited	Benign
20C0884	AF	US: Fetal anomalies: Double aortic archs with vascular ring	seq[GRCh37] del(4)(q22.1) chr4:g.92916996_93047925del	Constitutional	Inherited	Benign
19C0202	AF	US: Fetal anomalies: Pulmonary valve stenosis + RV hypertrophy + severe TR	seq[GRCh37] dup(2)(p16.3) chr2:g.50970246_51016299dup	Constitutional	Inherited	Benign
19C0202	AF	US: Fetal anomalies: Pulmonary valve stenosis + RV hypertrophy + severe TR	seq[GRCh37] del(6)(p25.1) chr6:g.5343458_5455434del	Constitutional	Inherited	Benign
19C0202	AF	US: Fetal anomalies: Pulmonary valve stenosis + RV hypertrophy + severe TR	seq[GRCh37] dup(15)(q24.3q25.1) chr15:g.78259105_78310686dup	Constitutional	Inherited	Benign
19C0853	CVS	Familial chr abn.: ectopia cordis	seq[GRCh37] dup(5)(p15.33) chr5:g.398986_631967dup	Constitutional	Inherited	Benign
20C0475	AF	ad mat age, positive Down screening risk: 1:2	seq[GRCh37] dup(7)(q35) chr7:g.145116162_145263682dup	Constitutional	Inherited	Benign
20C1539	AF	US: Fetal anomalies: Fetal cleft lip + palate	seq[GRCh37] dup(7)(q34) chr7:g.141758676_141783850dup	Constitutional	Inherited	Benign
20C1539	AF	US: Fetal anomalies: Fetal cleft lip + palate	seq[GRCh37] dup(X)(p11.22) chrX:g.53517366_53686493dup	Constitutional	Inherited	P/LP
19C0385	AF	ad mat age	seq[GRCh37] del(7)(q21.11) chr7:g.80040513_80207598del	Constitutional	Inherited	Benign
19C1385	AF	US: Fetal anomalies: encephalocele	seq[GRCh37] dup(12)(p12.3) chr12:g.17510346_17612853dup	Constitutional	Inherited	Benign
19C3292	AF	Non-invasive prenatal screening: increased chromosome 4	seq[GRCh37] dup(1)(q21.1) chr1:g.145625957_145994033dup	Constitutional	Inherited	Benign
19C3292	AF	Non-invasive prenatal screening: increased chromosome 4	seq[GRCh37] dup(4)(q35.2) chr4:g.189392134_189711206dup	Constitutional	Inherited	Benign
19C3292	AF	Non-invasive prenatal screening: increased chromosome 4	seq[GRCh37] del(16)(p13.3) chr16:g.7188057_7236691del	Constitutional	Inherited	Benign
19C0559	AF	Fetal anomalies: maternal chickenpox infection	seq[GRCh37] del(7)(p22.2) chr7:g.3357315_3411168del	Constitutional	Inherited	Benign
19C1646	AF	US: Fetal anomalies: MCDA twin with one twin cystic hygroma	seq[GRCh37] dup(6)(p11.2) chr6:g.58069800_58224922dup	Constitutional	Inherited	Benign
19C0399	AF	US: Fetal anomalies: RAA	seq[GRCh37] del(8)(q12.1) chr8:g.60637475_60705029del	Constitutional	Inherited	Benign
19C0399	AF	US: Fetal anomalies: RAA	seq[GRCh37] del(10)(q21.1) chr10:g.59592943_59765129del	Constitutional	Inherited	Benign
19C0399	AF	US: Fetal anomalies: RAA	seq[GRCh37] dup(X)(q28) chrX:g.152311832_152499482dup	Constitutional	Inherited	Benign
20C0177	AF	US: Fetal anomalies: cardiomegaly, mild TR, thickened myocardium, dilated renal pelvis	seq[GRCh37] dup(7)(p22.1) chr7:g.5757506_5935838dup	Constitutional	Inherited	Benign
19C1196	AF	US: Fetal anomalies: right femur fracture mesocardia	seq[GRCh37] del(5)(p15.31) chr5:g.7234711_7313679del	Constitutional	Inherited	Benign
19C2357	AF	positive Down screening risk: 1:140 by 1st trimester combined screening	seq[GRCh37] dup(X)(q28) chrX:g.152275906_152489045dup	Constitutional	Inherited	Benign
19C0614	AF	US: Fetal anomalies: Fetal cerebral ventriculomegaly	seq[GRCh37] dup(2)(p23.3) chr2:g.25852363_25925442dup	Constitutional	Inherited	Benign
19C0614	AF	US: Fetal anomalies: Fetal cerebral ventriculomegaly	seq[GRCh37] dup(2)(q23.3) chr2:g.152716591_153168204dup	Constitutional	Inherited	Benign
19C0650	AF	Non-invasive prenatal screening: SafeT21: high risk T13	seq[GRCh37] dup(2)(q21.1) chr2:g.130048399_130114456dup	Constitutional	Inherited	Benign
19C0431	AF	US: NT 4.1, NF normal	seq[GRCh37] del(3)(p24.1) chr3:g.28892505_29001861del	Constitutional	Inherited	Benign
19C1334	AF	positive Down screening risk: 2nd trimester: 1:65; Non-invasive prenatal screening: low fetal fraction	seq[GRCh37] dup(12)(q21.1) chr12:g.72175407_72285484dup	Constitutional	Inherited	Benign
19C1334	AF	positive Down screening risk: 2nd trimester: 1:65; Non-invasive prenatal screening: low fetal fraction	seq[GRCh37] dup(19)(p12) chr19:g.22229496_22405916dup	Constitutional	Inherited	Benign
20C0755	AF	Translocation carrier: Paternal: 46,XY,t(7;20)(q36;q12), Previous child/ pregnancy with chr abn: 1st fetus has 7q del+20p dup, Paternal translocation carrier, 2nd pregnancy now PGD done	seq[GRCh37] dup(8)(p22) chr8:g.14218409_14263064dup	Constitutional	Inherited	Benign
20C0755	AF	Translocation carrier: Paternal: 46,XY,t(7;20)(q36;q12), Previous child/ pregnancy with chr abn: 1st fetus has 7q del+20p dup, Paternal translocation carrier, 2nd pregnancy now PGD done	seq[GRCh37] dup(17)(p13.2) chr17:g.3938221_4136178dup	Constitutional	Inherited	Benign
19C1911	AF	US: Fetal anomalies: fetal absent DB + abnormal umbilical vein drainage	seq[GRCh37] dup(13)(q12.12) chr13:g.23636091_24067540dup	Constitutional	Inherited	Benign
19C1911	AF	US: Fetal anomalies: fetal absent DB + abnormal umbilical vein drainage	seq[GRCh37] del(19)(q13.42) chr19:g.53926200_54015240del	Constitutional	Inherited	Benign
18C1981	AF	ad mat age, Others: No call on Turner Syndrome on Panorama test	seq[GRCh37] del(11)(q14.3) chr11:g.90415062_90517774del	Constitutional	Inherited	Benign
19C0730	AF	US: Fetal anomalies: fetal TOF/DORV+LSVC+dilated renal pelvic, safeT21 +ve	seq[GRCh37] dup(5)(q35.2) chr5:g.175466544_175686154dup	Constitutional	Inherited	Benign
19C0730	AF	US: Fetal anomalies: fetal TOF/DORV+LSVC+dilated renal pelvic, safeT21 +ve	seq[GRCh37] dup(13)(q12.12) chr13:g.24574373_24685500dup	Constitutional	Inherited	Benign
19C1728	AF	Fetal anomalies: Truncus arteriosus type II	seq[GRCh37] dup(2)(p23.3) chr2:g.25608967_25749116dup	Constitutional	Inherited	Benign
19C1728	AF	Fetal anomalies: Truncus arteriosus type II	seq[GRCh37] dup(2)(p23.3) chr2:g.25765190_25979975dup	Constitutional	Inherited	Benign
19C1609	AF	ad mat age; Others: Maternal: Mos 45X/47XXX/46XX 7:5:88	seq[GRCh37] dup(2)(q35) chr2:g.216924361_217147276dup	Constitutional	Inherited	Benign
19C1609	AF	ad mat age; Others: Maternal: Mos 45X/47XXX/46XX 7:5:88	seq[GRCh37] del(6)(p22.2) chr6:g.26366295_26442063del	Constitutional	Inherited	Benign
19C0916	CVS	Fetal anomalies: NT 3 to 3.3mm	seq[GRCh37] del(10)(q25.1) chr10:g.111159153_111299057del	Constitutional	Inherited	Benign
19C0916	CVS	Fetal anomalies: NT 3 to 3.3mm	seq[GRCh37] dup(14)(q11.2) chr14:g.21353947_21410730dup	Constitutional	Inherited	Benign
20C1042	AF	Horseshoe kidney	seq[GRCh37] dup(X)(p22.2) chrX:g.11275803_11715091dup	Constitutional	Inherited	Benign
19C1778	AF	positive Down screening: Risk: 235	seq[GRCh37] del(4)(q22.1) chr4:g.92916996_93047925del	Constitutional	Inherited	Benign
19C1778	AF	positive Down screening: Risk: 235	seq[GRCh37] dup(12)(q14.2) chr12:g.63943357_64128154dup	Constitutional	Inherited	Benign
20C1522	AF	Non-invasive prenatal screening: high risk XXY	seq[GRCh37] del(8)(p23.1) chr8:g.9223911_9349956del	Constitutional	Inherited	Benign
20C1522	AF	Non-invasive prenatal screening: high risk XXY	seq[GRCh37] dup(15)(q24.3) chr15:g.77871967_77922238dup	Constitutional	Inherited	Benign
19C0741	AF	Non-invasive prenatal screening: NIFTY PRO: T10 high risk	seq[GRCh37] dup(1)(q21.1) chr1:g.146117887_146553671dup	Constitutional	Inherited	Benign
19C0929	AF	US: Fetal anomalies: complex CHD	seq[GRCh37] dup(1)(p21.1) chr1:g.103884025_104236410dup	Constitutional	Inherited	Benign
19C0929	AF	US: Fetal anomalies: complex CHD	seq[GRCh37] del(12)(q21.33) chr12:g.91121503_91200055del	Constitutional	Inherited	Benign
19C0589	AF	Others: Increase NT 2.7 mm at 12 week, structure NAD	seq[GRCh37] dup(5)(q14.3) chr5:g.85344727_85397583dup	Constitutional	Inherited	Benign
19C0589	AF	Others: Increase NT 2.7 mm at 12 week, structure NAD	seq[GRCh37] del(7)(q35) chr7:g.146139033_146385597del	Constitutional	Inherited	Benign
19C0589	AF	Others: Increase NT 2.7 mm at 12 week, structure NAD	seq[GRCh37] dup(12)(q24.33) chr12:g.132027774_132102205dup	Constitutional	Inherited	Benign
19C3275	AF	Non-invasive prenatal screening: sex chromosome number less than normal	seq[GRCh37] dup(3)(q26.31) chr3:g.173248085_173281328dup	Constitutional	Inherited	Benign
19C3275	AF	Non-invasive prenatal screening: sex chromosome number less than normal	seq[GRCh37] del(5)(q21.1) chr5:g.101473646_101532019del	Constitutional	Inherited	Benign
19C3275	AF	Non-invasive prenatal screening: sex chromosome number less than normal	seq[GRCh37] dup(7)(p21.1) chr7:g.17870005_18427306dup	Constitutional	Inherited	Benign
19C3275	AF	Non-invasive prenatal screening: sex chromosome number less than normal	seq[GRCh37] del(22)(q11.22) chr22:g.23050488_23109516del	Constitutional	Inherited	Benign
19C3641	AF	Non-invasive prenatal screening: NIPT: high risk XXY	seq[GRCh37] del(10)(q26.3) chr10:g.135236827_135387829del	Constitutional	Inherited	Benign
19C3641	AF	Non-invasive prenatal screening: NIPT: high risk XXY	seq[GRCh37] dup(Y)(q11.221) chrY:g.16288986_16542678dup	Constitutional	Inherited	Benign
19C0251	CVS	US: Fetal anomalies: DSS1 on 21-Jan-2019 --> cystic hygroma	seq[GRCh37] dup(3)(p14.2) chr3:g.61776853_61911039dup	Constitutional	Inherited	Benign
20C0652	AF	VSD, coarctation of aorta	seq[GRCh37] del(4)(q22.1) chr4:g.92912209_93047925del	Constitutional	Inherited	Benign
20C0652	AF	VSD, coarctation of aorta	seq[GRCh37] dup(8)(q12.1) chr8:g.57328419_57426741dup	Constitutional	Inherited	Benign
20C0652	AF	VSD, coarctation of aorta	seq[GRCh37] del(16)(q23.1) chr16:g.78807063_78962067del	Constitutional	Inherited	Benign
19C2834	AF	US: Right sided aortic arch	seq[GRCh37] del(3)(p21.31) chr3:g.46796984_46854370del	Constitutional	Inherited	Benign
19C2834	AF	US: Right sided aortic arch	seq[GRCh37] del(12)(p12.3) chr12:g.17253507_17342165del	Constitutional	Inherited	Benign
20C0170	AF	Others: For screening	seq[GRCh37] del(7)(p12.1) chr7:g.53460935_53598027del	Constitutional	Inherited	Benign
20C0170	AF	Others: For screening	seq[GRCh37] del(14)(q21.3) chr14:g.48230465_48278228del	Constitutional	Inherited	Benign
20C0170	AF	Others: For screening	seq[GRCh37] dup(15)(q13.2) chr15:g.30916167_31095873dup	Constitutional	Inherited	Benign
20C0170	AF	Others: For screening	seq[GRCh37] del(17)(q21.31) chr17:g.43378361_44787166del	Constitutional	Inherited	Benign
19C1830	AF	positive Down screening: Risk: T21 1:98, NT 1.9mm	seq[GRCh37] del(5)(q21.1) chr5:g.101466822_101531242del	Constitutional	Inherited	Benign
19C1830	AF	positive Down screening: Risk: T21 1:98, NT 1.9mm	seq[GRCh37] dup(16)(p11.2) chr16:g.34471733_34761071dup	Constitutional	Inherited	Benign
19C1830	AF	positive Down screening: Risk: T21 1:98, NT 1.9mm	seq[GRCh37] del(16)(q23.2) chr16:g.81193350_81259169del	Constitutional	Inherited	Benign
19C3535	AF	Non-invasive prenatal screening: positive XXY	seq[GRCh37] del(3)(p26.3) chr3:g.1929373_2050922del	Constitutional	Inherited	Benign
19C1565	AF	positive Down screening risk: 1:2, husband has neurofibromatosis	seq[GRCh37] del(2)(p16.3) chr2:g.49816896_49869084del	Constitutional	Inherited	Benign
20C0010	AF	US: Fetal anomalies: NT4.0mm at 12 weeks, small gall bladder	seq[GRCh37] dup(7)(p21.1) chr7:g.19052054_19102797dup	Constitutional	Inherited	Benign
20C0010	AF	US: Fetal anomalies: NT4.0mm at 12 weeks, small gall bladder	seq[GRCh37] del(10)(q21.3) chr10:g.68406356_68682739del	Constitutional	Inherited	Benign
19C1374	AF	Fetal anomalies: fetus USG showed Horseshoe Kidney	seq[GRCh37] del(10)(q21.1) chr10:g.59570606_59771459del	Constitutional	Inherited	Benign
19C2090	AF	Non-invasive prenatal screening: mild reduction in Chromosome X DNA	seq[GRCh37] dup(4)(p14) chr4:g.39883307_40158997dup	Constitutional	Inherited	Benign
19C2090	AF	Non-invasive prenatal screening: mild reduction in Chromosome X DNA	seq[GRCh37] dup(16)(q24.3) chr16:g.89112136_89135921dup	Constitutional	Inherited	Benign
20C0776	CVS	positive Down screening risk: 1:99	seq[GRCh37] del(1)(q43) chr1:g.239625614_240628419del	Constitutional	Inherited	VUS
20C0776	CVS	positive Down screening risk: 1:99	seq[GRCh37] dup(4)(q22.3) chr4:g.98309166_98372469dup	Constitutional	Inherited	Benign
20C0776	CVS	positive Down screening risk: 1:99	seq[GRCh37] del(7)(p21.1) chr7:g.16992694_17240868del	Constitutional	Inherited	Benign
20C0776	CVS	positive Down screening risk: 1:99	seq[GRCh37] del(22)(q13.31) chr22:g.47939210_48217847del	Constitutional	Inherited	Benign
20C0443	AF	Non-invasive prenatal screening: increased risk for DiGeorge syndrome (22q11.2 deletion)	seq[GRCh37] del(1)(q31.1) chr1:g.188100409_188402860del	Constitutional	Inherited	Benign
20C0443	AF	Non-invasive prenatal screening: increased risk for DiGeorge syndrome (22q11.2 deletion)	seq[GRCh37] del(8)(p23.2) chr8:g.4568234_4630092del	Constitutional	Inherited	Benign
20C0443	AF	Non-invasive prenatal screening: increased risk for DiGeorge syndrome (22q11.2 deletion)	seq[GRCh37] del(20)(p12.1) chr20:g.15044253_15145835del	Constitutional	Inherited	Benign
20C0382	AF	US: Fetal anomalies: brachycephaly + aberrant right subclavian artery	seq[GRCh37] del(18)(p11.21) chr18:g.14117574_14351237del	Constitutional	Inherited	Benign
19C1315	CVS	Familial chr. Abn.: patient's daughter has retinoblastoma	seq[GRCh37] del(11)(q14.3) chr11:g.90957567_91047208del	Constitutional	Inherited	Benign
19C0430	AF	US: Right fetal lateral ventriculomegaly	seq[GRCh37] del(1)(p31.1) chr1:g.74770647_74862203del	Constitutional	Inherited	Benign
19C0430	AF	US: Right fetal lateral ventriculomegaly	seq[GRCh37] del(3)(q26.1) chr3:g.165040102_165084018del	Constitutional	Inherited	Benign
19C0430	AF	US: Right fetal lateral ventriculomegaly	seq[GRCh37] del(4)(q13.3) chr4:g.73696303_73760609del	Constitutional	Inherited	Benign
19C0430	AF	US: Right fetal lateral ventriculomegaly	seq[GRCh37] dup(11)(q23.3) chr11:g.119293120_119403580dup	Constitutional	Inherited	Benign
19C0430	AF	US: Right fetal lateral ventriculomegaly	seq[GRCh37] dup(12)(p11.21) chr12:g.31271425_31408579dup	Constitutional	Inherited	Benign
19C2765	AF	US: Fetal anomalies: DCDA twin, Left twin has CDH (Left sided)	seq[GRCh37] dup(9)(p24.3) chr9:g.690138_774799dup	Constitutional	Inherited	Benign
20C1115	AF	ad mat age, Non-invasive prenatal screening: Atypical findings on Panorama test	seq[GRCh37] del(18)(p11.21) chr18:g.14555003_14742945del	Constitutional	Inherited	Benign
19C3379	AF	ad mat age, Non-invasive prenatal screening: No call on fetal Turner syndrome	seq[GRCh37] dup(3)(p14.2) chr3:g.60566598_60739829dup	Constitutional	Inherited	Benign
19C3379	AF	ad mat age, Non-invasive prenatal screening: No call on fetal Turner syndrome	seq[GRCh37] dup(18)(q23) chr18:g.74407546_74471509dup	Constitutional	Inherited	Benign
19C0450	AF	PGS: mosaic chromosome 2 gain	seq[GRCh37] del(4)(q28.1) chr4:g.127403459_127697538del	Constitutional	Inherited	Benign
19C0450	AF	PGS: mosaic chromosome 2 gain	seq[GRCh37] dup(Y)(q11.223q11.23) chrY:g.24183552_27220336dup	Constitutional	Inherited	Benign
20C0057	AF	US: Fetal anomalies: early onset IUGR	seq[GRCh37] del(4)(q28.3) chr4:g.134920755_135189230del	Constitutional	Inherited	Benign
20C0057	AF	US: Fetal anomalies: early onset IUGR	seq[GRCh37] dup(6)(q27) chr6:g.168332623_168596359dup	Constitutional	Inherited	Benign
20C0057	AF	US: Fetal anomalies: early onset IUGR	seq[GRCh37] del(7)(q31.1) chr7:g.111125416_111237561del	Constitutional	Inherited	Benign
20C0057	AF	US: Fetal anomalies: early onset IUGR	seq[GRCh37] dup(15)(q25.3) chr15:g.85797150_86114026dup	Constitutional	Inherited	Benign
20C0057	AF	US: Fetal anomalies: early onset IUGR	seq[GRCh37] dup(15)(q26.1) chr15:g.90835552_91005653dup	Constitutional	Inherited	Benign
19C3556	AF	US: Fetal anomalies: Ambiguous genitalia, short FL, NIPT: XY	seq[GRCh37] dup(1)(p31.3) chr1:g.65922290_66022541dup	Constitutional	Inherited	Benign
19C3556	AF	US: Fetal anomalies: Ambiguous genitalia, short FL, NIPT: XY	seq[GRCh37] dup(1)(q21.1) chr1:g.146494275_146674899dup	Constitutional	Inherited	Benign
19C1599	AF	Fetal anomalies: Hydrocephalus (Fetus)	seq[GRCh37] del(6)(p25.1) chr6:g.5479184_5598119del	Constitutional	Inherited	Benign
19C1151	AF	Fetal anomalies: NT 2.6mm >95th percentile, US: cleft lip; positive Down screening risk: 1:115; Non-invasive prenatal screening: low risk	seq[GRCh37] del(2)(q32.1) chr2:g.185992239_186083763del	Constitutional	Inherited	Benign
17C1303	AF	US: Fetal anomalies: Fetal left cleft lip	seq[GRCh37] dup(4)(q21.21) chr4:g.81579805_81773108dup	Constitutional	Inherited	Benign
17C1303	AF	US: Fetal anomalies: Fetal left cleft lip	seq[GRCh37] del(21)(q22.11) chr21:g.32806201_33041800del	Constitutional	Inherited	Benign
17C1303	AF	US: Fetal anomalies: Fetal left cleft lip	seq[GRCh37] dup(Y)(p11.2) chrY:g.9496649_9710868dup	Constitutional	Inherited	Benign
19C0168	AF	Non-invasive prenatal screening: no report from NIPT	seq[GRCh37] del(1)(q24.2) chr1:g.167509717_167566869del	Constitutional	Inherited	Benign
19C0168	AF	Non-invasive prenatal screening: no report from NIPT	seq[GRCh37] dup(3)(p25.1) chr3:g.13719818_13777140dup	Constitutional	Inherited	Benign
19C0168	AF	Non-invasive prenatal screening: no report from NIPT	seq[GRCh37] del(6)(p22.2) chr6:g.26387137_26443137del	Constitutional	Inherited	Benign
19C0168	AF	Non-invasive prenatal screening: no report from NIPT	seq[GRCh37] dup(X)(p11.23) chrX:g.49043025_49131676dup	Constitutional	Inherited	Benign
19C0928	AF	US: Fetal anomalies: DORV with smaller aorta, VSD, aortic origin of LPA, ARSA	seq[GRCh37] del(4)(p16.1) chr4:g.11010683_11082817del	Constitutional	Inherited	Benign
19C3572	AF	US: Fetal anomalies: TTTS stage 2 & sIUGR stage 1	seq[GRCh37] dup(2)(q33.1) chr2:g.198913209_199051482dup	Constitutional	Inherited	Benign
19C3572	AF	US: Fetal anomalies: TTTS stage 2 & sIUGR stage 1	seq[GRCh37] del(12)(q21.1) chr12:g.74708089_74896327del	Constitutional	Inherited	Benign
19C2721	AF	US: Fetal anomalies: Left little finger missing phalanges	seq[GRCh37] dup(2)(q22.2) chr2:g.142814073_142840766dup	Constitutional	Inherited	Benign
19C2721	AF	US: Fetal anomalies: Left little finger missing phalanges	seq[GRCh37] dup(3)(p22.3) chr3:g.32570567_33122809dup	Constitutional	Inherited	Benign
19C0925	CVS	Translocation carrier: balanced translocation between 14q & 22q terminal; Previous child/ pregnancy with chr abn: (pregnancy) Phelan-McDermid Syndrome	seq[GRCh37] dup(19)(p13.3) chr19:g.61245_359028dup	Constitutional	Inherited	Benign
19C1249	AF	US: Fetal anomalies: VSD coarctation of aorta	seq[GRCh37] dup(8)(q24.22) chr8:g.135633618_135790580dup	Constitutional	Inherited	Benign
20C0988	AF	Non-invasive prenatal screening: low fetal fraction	seq[GRCh37] dup(3)(q23) chr3:g.141820321_142085222dup	Constitutional	Inherited	Benign
20C0988	AF	Non-invasive prenatal screening: low fetal fraction	seq[GRCh37] del(7)(p12.1) chr7:g.53460935_53593368del	Constitutional	Inherited	Benign
20C0988	AF	Non-invasive prenatal screening: low fetal fraction	seq[GRCh37] del(18)(q22.1) chr18:g.65846640_65896840del	Constitutional	Inherited	Benign
17C1295	AF	US: Fetal anomalies: Bilateral CLCP, ARSA, 13 pairs of ribs small stomach	seq[GRCh37] del(6)(q14.1) chr6:g.77909434_78076421del	Constitutional	Inherited	Benign
19C2239	AF	US: thickened mitral valve	seq[GRCh37] del(12)(q24.33) chr12:g.131727410_131828197del	Constitutional	Inherited	Benign
19C1887	AF	US: DCDA twin, right twin posterior and placenta also postertior, NT1.8 mm, positive Down screening risk: 1:198	seq[GRCh37] del(7)(q31.1) chr7:g.108446070_108520970del	Constitutional	Inherited	Benign
19C1887	AF	US: DCDA twin, right twin posterior and placenta also postertior, NT1.8 mm, positive Down screening risk: 1:198	seq[GRCh37] dup(14)(q31.3) chr14:g.88512858_88645331dup	Constitutional	Inherited	Benign
19C1887	AF	US: DCDA twin, right twin posterior and placenta also postertior, NT1.8 mm, positive Down screening risk: 1:198	seq[GRCh37] dup(X)(q25) chrX:g.125361428_125947223dup	Constitutional	Inherited	Benign
19C3682	AF	maternal anxiety	seq[GRCh37] del(1)(p36.32) chr1:g.5109287_5178500del	Constitutional	Inherited	Benign
19C3682	AF	maternal anxiety	seq[GRCh37] dup(5)(q31.3) chr5:g.144136108_144186874dup	Constitutional	Inherited	Benign
19C3682	AF	maternal anxiety	seq[GRCh37] dup(12)(p13.31) chr12:g.8278202_8680845dup	Constitutional	Inherited	Benign
19C3682	AF	maternal anxiety	seq[GRCh37] dup(14)(q23.2) chr14:g.62635463_62784780dup	Constitutional	Inherited	Benign
19C2678	AF	Positive Down Screening: Risk: 1:185	seq[GRCh37] dup(12)(q11) chr12:g.37863417_38912884dup	Constitutional	Inherited	Benign
19C2678	AF	Positive Down Screening: Risk: 1:185	seq[GRCh37] dup(X)(p11.3) chrX:g.45837074_46945081dup	Constitutional	Inherited	VUS
20C0216	AF	US: Fetal tricuspid regurgitation	seq[GRCh37] del(11)(q14.2) chr11:g.87788653_87877092del	Constitutional	Inherited	Benign
20C0216	AF	US: Fetal tricuspid regurgitation	seq[GRCh37] dup(16)(p12.2) chr16:g.21390420_21861771dup	Constitutional	Inherited	Benign
19C2910	AF	US: 1) small VSD, 2) echogenic cranium, 3.NIPT showed X abnormality	seq[GRCh37] dup(6)(q27) chr6:g.165129013_165201871dup	Constitutional	Inherited	Benign
19C2910	AF	US: 1) small VSD, 2) echogenic cranium, 3.NIPT showed X abnormality	seq[GRCh37] del(7)(q21.11) chr7:g.80035851_80090777del	Constitutional	Inherited	Benign
19C2910	AF	US: 1) small VSD, 2) echogenic cranium, 3.NIPT showed X abnormality	seq[GRCh37] del(12)(q13.11) chr12:g.48668910_48713253del	Constitutional	Inherited	Benign
20C0779	AF	US: Fetal anomalies: Fetal ascites, increased MCA-PSV, likely fetal anemia, low MCV couple	seq[GRCh37] del(2)(p16.1) chr2:g.56703206_56762045del	Constitutional	Inherited	Benign
19C0303	AF	positive Down screening: Risk: 1:2 NT 3.3mm	seq[GRCh37] dup(9)(p24.1) chr9:g.4734127_5087666dup	Constitutional	Inherited	VUS
19C1128	CVS	Non-invasive prenatal screening: NIFTY high risk del(8q22.1-q24.23,43.64M)	seq[GRCh37] del(5)(q21.1) chr5:g.101469082_101543744del	Constitutional	Inherited	Benign
20C1033	AF	US: Fetal anomalies: NT 6.63mm, positive Down screening risk: 1:15, Non-invasive prenatal screening: negative	seq[GRCh37] dup(X)(p22.2) chrX:g.16876774_16909615dup	Constitutional	Inherited	Benign
19C3100	AF	ad mat age	seq[GRCh37] dup(6)(q16.3) chr6:g.104165351_104947171dup	Constitutional	Inherited	Benign
19C0403	AF	US: Fetal anomalies: MCDA with sIUGR	seq[GRCh37] dup(3)(p26.1) chr3:g.6843061_7332273dup	Constitutional	Inherited	Benign
19C0403	AF	US: Fetal anomalies: MCDA with sIUGR	seq[GRCh37] del(16)(p13.12) chr16:g.13341943_13407668del	Constitutional	Inherited	Benign
19C0996	AF	Maternal anxiety	seq[GRCh37] dup(1)(p31.3) chr1:g.65925126_66026748dup	Constitutional	Inherited	Benign
19C0996	AF	Maternal anxiety	seq[GRCh37] dup(9)(p21.1) chr9:g.30334255_30368689dup	Constitutional	Inherited	Benign
19C0996	AF	Maternal anxiety	seq[GRCh37] del(11)(q22.3) chr11:g.103464921_103622748del	Constitutional	Inherited	Benign
18C1813	AF	ad mat age	seq[GRCh37] dup(2)(p13.1) chr2:g.73861507_73955780dup	Constitutional	Inherited	Benign
18C1813	AF	ad mat age	seq[GRCh37] dup(16)(p12.3) chr16:g.18316091_18791989dup	Constitutional	Inherited	Benign
18C1813	AF	ad mat age	seq[GRCh37] dup(20)(q13.13) chr20:g.46473175_46666130dup	Constitutional	Inherited	Benign
20C1813	AF	Non-invasive prenatal screening: SafeT21 -> XX normal, but male phenotype on ultrasound	seq[GRCh37] del(2)(p22.1) chr2:g.41514661_41576521del	Constitutional	Inherited	Benign
20C1813	AF	Non-invasive prenatal screening: SafeT21 -> XX normal, but male phenotype on ultrasound	seq[GRCh37] del(11)(p11.12) chr11:g.48954763_49054033del	Constitutional	Inherited	Benign
20C1813	AF	Non-invasive prenatal screening: SafeT21 -> XX normal, but male phenotype on ultrasound	seq[GRCh37] del(18)(q12.3) chr18:g.39742370_39802835del	Constitutional	Inherited	Benign
20C1813	AF	Non-invasive prenatal screening: SafeT21 -> XX normal, but male phenotype on ultrasound	seq[GRCh37] dup(21)(q21.1) chr21:g.19373528_19428443dup	Constitutional	Inherited	Benign
19C3643	CVS	Beta thal couple	seq[GRCh37] dup(1)(q22) chr1:g.155638339_155828441dup	Constitutional	Inherited	Benign
19C3643	CVS	Beta thal couple	seq[GRCh37] dup(17)(q25.3) chr17:g.80917673_81045396dup	Constitutional	Inherited	Benign
19C3643	CVS	Beta thal couple	seq[GRCh37] dup(X)(q11.1) chrX:g.61954283_61990976dup	Constitutional	Inherited	Benign
19C3643	CVS	Beta thal couple	seq[GRCh37] dup(X)(q28) chrX:g.149084103_149391287dup	Constitutional	Inherited	Benign
19C3615	CVS	US: NT 4.8mm	seq[GRCh37] dup(10)(p15.1) chr10:g.4451228_4548072dup	Constitutional	Inherited	Benign
19C3615	CVS	US: NT 4.8mm	seq[GRCh37] del(15)(q13.3) chr15:g.31978294_32718966del	Constitutional	Inherited	VUS
19C0337	AF	Previous child/pregnancy with chr abn: previous MTOP for renal dysgenesis with aCGH microduplication 936.46 kb in 11q22.3	seq[GRCh37] dup(4)(p14) chr4:g.40046981_40140357dup	Constitutional	Inherited	Benign
19C0337	AF	Previous child/pregnancy with chr abn: previous MTOP for renal dysgenesis with aCGH microduplication 936.46 kb in 11q22.3	seq[GRCh37] dup(9)(q22.33) chr9:g.101343292_101677469dup	Constitutional	Inherited	VUS
19C0667	AF	US: Fetal anomalies: small VSD	seq[GRCh37] dup(3)(q13.13) chr3:g.108482115_108928555dup	Constitutional	Inherited	Benign
19C1946	AF	Non-invasive prenatal screening: positive T13, T18 triploidy	seq[GRCh37] del(4)(q31.21) chr4:g.144800888_145057730del	Constitutional	Inherited	Benign
19C1946	AF	Non-invasive prenatal screening: positive T13, T18 triploidy	seq[GRCh37] dup(5)(p15.33) chr5:g.44767_126100dup	Constitutional	Inherited	Benign
19C1946	AF	Non-invasive prenatal screening: positive T13, T18 triploidy	seq[GRCh37] del(7)(q11.22) chr7:g.69086588_69117932del	Constitutional	Inherited	Benign
19C3280	AF	Non-invasive prenatal screening: increase 10q	seq[GRCh37] dup(2)(p16.3) chr2:g.50970262_51020898dup	Constitutional	Inherited	Benign
19C3280	AF	Non-invasive prenatal screening: increase 10q	seq[GRCh37] dup(2)(q14.1) chr2:g.114580051_114629999dup	Constitutional	Inherited	Benign
19C3280	AF	Non-invasive prenatal screening: increase 10q	seq[GRCh37] dup(17)(q25.3) chr17:g.75781245_75840112dup	Constitutional	Inherited	Benign
19C1700	AF	US: SUA, Tortuous aortic arch, Hx of NT 3.3mm	seq[GRCh37] del(2)(q13) chr2:g.110760994_111149662del	Constitutional	Inherited	Benign
19C1700	AF	US: SUA, Tortuous aortic arch, Hx of NT 3.3mm	seq[GRCh37] del(12)(p12.3) chr12:g.16979822_17137877del	Constitutional	Inherited	Benign
19C3005	AF	US: Fetal anomalies: Right cleft lip and palate	seq[GRCh37] del(11)(q14.3) chr11:g.91758202_91825815del	Constitutional	Inherited	Benign
19C0400	AF	US: Fetal anomalies: MCDA twins TTTS type I sIUGR, smaller stucked fetus IUFD (Donor) Recipient survivor, pulmonary valvular stenosis with thickened valve.	seq[GRCh37] dup(14)(q12) chr14:g.32285823_32351704dup	Constitutional	Inherited	Benign
19C0649	AF	Others: Fetal echo: Transposition of great arteries.	seq[GRCh37] del(7)(q34) chr7:g.142817872_142910689del	Constitutional	Inherited	Benign
19C0649	AF	Others: Fetal echo: Transposition of great arteries.	seq[GRCh37] dup(13)(q34) chr13:g.111684469_111781947dup	Constitutional	Inherited	Benign
19C0146	AF	positive Down screening: Risk: 1:132	seq[GRCh37] dup(2)(q14.1) chr2:g.114575085_114654249dup	Constitutional	Inherited	Benign
19C0176	AF	Non-invasive prenatal screening: NIFTY: high risk for deletion 3q24-q27.2	seq[GRCh37] dup(11)(p15.4) chr11:g.4261800_4393719dup	Constitutional	Inherited	Benign
19C0176	AF	Non-invasive prenatal screening: NIFTY: high risk for deletion 3q24-q27.2	seq[GRCh37] dup(14)(q22.3) chr14:g.56183434_56265067dup	Constitutional	Inherited	Benign
19C3610	AF	Non-invasive prenatal screening: increase chromosome 14	seq[GRCh37] dup(8)(q13.3) chr8:g.72298572_72348386dup	Constitutional	Inherited	Benign
19C1503	CVS	positive Down screening: Risk: T21 1:2, T13 & T18 +ve; US: NT 6mm	seq[GRCh37] dup(6)(q26) chr6:g.162426607_162623677dup	Constitutional	Inherited	Benign
19C1503	CVS	positive Down screening: Risk: T21 1:2, T13 & T18 +ve; US: NT 6mm	seq[GRCh37] dup(Y)(q11.223) chrY:g.23532196_23730113dup	Constitutional	Inherited	Benign
19C3234	AF	US: NT 4.4mm at 11 weeks	seq[GRCh37] dup(5)(q21.3) chr5:g.107987980_108148975dup	Constitutional	Inherited	Benign
19C3234	AF	US: NT 4.4mm at 11 weeks	seq[GRCh37] dup(X)(p22.2) chrX:g.13719600_13761564dup	Constitutional	Inherited	Benign
20C1306	AF	US: Fetal anomalies: Fetal RAA, Non-invasive prenatal screening: SafeT21 Express: low risk	seq[GRCh37] dup(12)(p13.1) chr12:g.13502431_13667134dup	Constitutional	Inherited	Benign
19C0170	AF	Non-invasive prenatal screening: high risk for 15q11.2-13.1 deletion	seq[GRCh37] dup(6)(p12.1) chr6:g.54146878_54264299dup	Constitutional	Inherited	Benign
19C1686	CVS	US: Fetal anomalies: diffuse cystic placenta, plcental thickness 2.39 cm	seq[GRCh37] dup(15)(q25.1) chr15:g.80211077_80257119dup	Constitutional	Inherited	Benign
19C0997	CVS	SMA carrier couple	seq[GRCh37] dup(2)(q11.2) chr2:g.99876256_99984437dup	Constitutional	Inherited	Benign
19C0997	CVS	SMA carrier couple	seq[GRCh37] del(3)(p14.2) chr3:g.61671027_61751117del	Constitutional	Inherited	Benign
19C0997	CVS	SMA carrier couple	seq[GRCh37] dup(5)(p13.2) chr5:g.37161043_37342181dup	Constitutional	Inherited	Benign
19C0997	CVS	SMA carrier couple	seq[GRCh37] del(12)(q23.1) chr12:g.99922858_99968860del	Constitutional	Inherited	Benign
19C0997	CVS	SMA carrier couple	seq[GRCh37] del(16)(q23.3) chr16:g.81747673_81800830del	Constitutional	Inherited	Benign
19C0051	AF	US: Fetal anomalies: severe bilateral hydroncephalus, ? Agenesis corpus callosum	seq[GRCh37] del(10)(p12.1) chr10:g.29019738_29177528del	Constitutional	Inherited	Benign
19C0051	AF	US: Fetal anomalies: severe bilateral hydroncephalus, ? Agenesis corpus callosum	seq[GRCh37] del(11)(q14.1) chr11:g.81287339_81348154del	Constitutional	Inherited	Benign
19C0051	AF	US: Fetal anomalies: severe bilateral hydroncephalus, ? Agenesis corpus callosum	seq[GRCh37] del(12)(p12.3) chr12:g.18299846_18385142del	Constitutional	Inherited	Benign
19C2652	AF	ad mat age, US: Fetal anomalies: ? agenesis of corpus callosum	seq[GRCh37] del(3)(p22.1) chr3:g.41564856_41668653del	Constitutional	Inherited	Benign
19C2652	AF	ad mat age, US: Fetal anomalies: ? agenesis of corpus callosum	seq[GRCh37] del(5)(p15.1) chr5:g.17726139_17776770del	Constitutional	Inherited	Benign
19C2652	AF	ad mat age, US: Fetal anomalies: ? agenesis of corpus callosum	seq[GRCh37] dup(14)(q21.3) chr14:g.48271798_48417224dup	Constitutional	Inherited	Benign
19C2652	AF	ad mat age, US: Fetal anomalies: ? agenesis of corpus callosum	seq[GRCh37] dup(17)(p11.2) chr17:g.18847088_18927475dup	Constitutional	Inherited	Benign
19C1006	AF	Familial chr.abn.: 47,XN,+mar	seq[GRCh37] del(11)(q25) chr11:g.131848738_131889070del	Constitutional	Inherited	Benign
19C3307	AF	US:Fetal anomalies: Tetralogy of Fallot + right aortic arch	seq[GRCh37] del(10)(q21.1) chr10:g.59570606_59771459del	Constitutional	Inherited	Benign
18C1930	AF	Previous child/pregnancy with major thalassemia; α thal couple, THAI/αα and SEA/αα	seq[GRCh37] dup(2)(q14.1) chr2:g.116521696_116708139dup	Constitutional	Inherited	Benign
18C1930	AF	Previous child/pregnancy with major thalassemia; α thal couple, THAI/αα and SEA/αα	seq[GRCh37] del(3)(p21.1) chr3:g.54243651_54353836del	Constitutional	Inherited	Benign
18C1930	AF	Previous child/pregnancy with major thalassemia; α thal couple, THAI/αα and SEA/αα	seq[GRCh37] del(4)(q28.3) chr4:g.137528732_137640321del	Constitutional	Inherited	Benign
18C1930	AF	Previous child/pregnancy with major thalassemia; α thal couple, THAI/αα and SEA/αα	seq[GRCh37] del(7)(q31.1) chr7:g.111002398_111155912del	Constitutional	Inherited	Benign
18C1930	AF	Previous child/pregnancy with major thalassemia; α thal couple, THAI/αα and SEA/αα	seq[GRCh37] dup(15)(q25.2) chr15:g.81949096_82032775dup	Constitutional	Inherited	Benign
19C2924	AF	positive Down screening risk: 1:117, NT 1.9mm	seq[GRCh37] del(19)(p12) chr19:g.23717966_23781691del	Constitutional	Inherited	Benign
19C2449	CVS	Fetal anomalies: NT3.1->3.3mm	seq[GRCh37] del(7)(q11.23) chr7:g.76104316_76609274del	Constitutional	Inherited	Benign
17C1690	AF	US: Fetal anomalies: Right aortic arch	seq[GRCh37] dup(1)(q31.3) chr1:g.196713630_196817974dup	Constitutional	Inherited	Benign
17C1690	AF	US: Fetal anomalies: Right aortic arch	seq[GRCh37] dup(8)(p11.1) chr8:g.43235378_43375980dup	Constitutional	Inherited	Benign
20C1253	AF	Non-invasive prenatal screening: increased 7 DNA	seq[GRCh37] dup(7)(p22.3) chr7:g.9992_82427dup	Constitutional	Inherited	Benign
19C1671	AF	ad mat age	seq[GRCh37] del(11)(p12) chr11:g.37642899_37864638del	Constitutional	Inherited	Benign
19C3524	AF	Fetal anomalies: increased NT in the first trimester	seq[GRCh37] dup(7)(q22.1) chr7:g.98757431_98804592dup	Constitutional	Inherited	Benign
20C0159	AF	US: Fetal anomalies: Thick NT of 7.4mm	seq[GRCh37] dup(5)(q21.2q21.3) chr5:g.104359883_104921367dup	Constitutional	Inherited	Benign
20C0159	AF	US: Fetal anomalies: Thick NT of 7.4mm	seq[GRCh37] del(6)(q16.3) chr6:g.102903266_102992941del	Constitutional	Inherited	Benign
19C3440	AF	Non-invasive prenatal screening: mild decrease 11.5 Mb at 8q11.21-8q12.1	seq[GRCh37] del(2)(p24.1) chr2:g.21864998_22009084del	Constitutional	Inherited	Benign
19C3440	AF	Non-invasive prenatal screening: mild decrease 11.5 Mb at 8q11.21-8q12.1	seq[GRCh37] dup(6)(q22.1) chr6:g.117499937_117564401dup	Constitutional	Inherited	Benign
19C3440	AF	Non-invasive prenatal screening: mild decrease 11.5 Mb at 8q11.21-8q12.1	seq[GRCh37] del(8)(p23.1) chr8:g.8553643_8603484del	Constitutional	Inherited	Benign
19C3440	AF	Non-invasive prenatal screening: mild decrease 11.5 Mb at 8q11.21-8q12.1	seq[GRCh37] dup(11)(q24.3) chr11:g.129527999_129667193dup	Constitutional	Inherited	Benign
19C3440	AF	Non-invasive prenatal screening: mild decrease 11.5 Mb at 8q11.21-8q12.1	seq[GRCh37] dup(X)(q21.32q21.33) chrX:g.93465304_93732920dup	Constitutional	Inherited	Benign
19C3440	AF	Non-invasive prenatal screening: mild decrease 11.5 Mb at 8q11.21-8q12.1	seq[GRCh37] dup(X)(q21.33) chrX:g.96194144_96687031dup	Constitutional	Inherited	VUS
20C2527	AF	ad mat age, Previous child/ pregnancy with chr abn: previous fetal T21, Non-invasive prenatal screening: sex not reportable	seq[GRCh37] dup(4)(q31.1) chr4:g.140134220_140178788dup	Constitutional	Inherited	Benign
20C2527	AF	ad mat age, Previous child/ pregnancy with chr abn: previous fetal T21, Non-invasive prenatal screening: sex not reportable	seq[GRCh37] del(8)(p23.2) chr8:g.3912758_4037984del	Constitutional	Inherited	Benign
20C2527	AF	ad mat age, Previous child/ pregnancy with chr abn: previous fetal T21, Non-invasive prenatal screening: sex not reportable	seq[GRCh37] del(10)(q21.1) chr10:g.57095361_57328772del	Constitutional	Inherited	Benign
19C0339	AF	US: Fetal anomalies: cardiomegaly, pericardial effusion, thickened myometrium, enlarged liver	seq[GRCh37] del(16)(p13.3) chr16:g.217215_237434del	Constitutional	Inherited	P/LP
19C0855	CVS	US: Increased NT 4.75mm, absent nasal bone, increased placental thickness	seq[GRCh37] del(16)(p13.3) chr16:g.216050_235599del	Constitutional	Inherited	P/LP
19C0330	AF	US: Others: USG at 21 week: Dilated Bowel Loops up to 1 cm, Non-invasive prenatal screening: NIFTY negative	seq[GRCh37] dup(3)(q26.32) chr3:g.177014655_177064149dup	Constitutional	Inherited	Benign
20C2396	AF	ad mat age, Non-invasive prenatal screening: HR for monosomy x on Panorama test	seq[GRCh37] del(X)(p11.21q28) chrX:g.58071563_154926366del	Mosaic	de novo	P/LP
20C2527	AF	ad mat age, Previous child/ pregnancy with chr abn: previous fetal T21, Non-invasive prenatal screening: sex not reportable	seq[GRCh37] dup(Y)(p11.31q11.221) chrY:g.2649473_19567688dup	Mosaic	de novo	P/LP
20C2527	AF	ad mat age, Previous child/ pregnancy with chr abn: previous fetal T21, Non-invasive prenatal screening: sex not reportable	seq[GRCh37] del(Y)(q11.221q12) chrY:g.19567689_59033394del	Mosaic	de novo	P/LP
19C1149	CVS	US: Fetal anomalies: NT 5.22mm, suggestive cystic hygroma; positive Down screening risk: 1:2, T13 & T18 positive	seq[GRCh37] dup(8)(p21.2q24.3) chr8:g.23815054_146298884dup	Mosaic	de novo	P/LP
20C1831	AF	Non-invasive prenatal screening: SafeT21: decreased Xp chromosome	seq[GRCh37] dup(X)(p11.21q28) chrX:g.57483831_154926366dup	Mosaic	de novo	P/LP
19C3563	CVS	US: Fetal anomalies: cardiomegaly, tricuspid valve abn, +/- pul. valve abn	seq[GRCh37] del(20)(q13.33) chr20:g.61942378_62945038del	Mosaic	de novo	VUS

## Sheet: Supp Table S3
Supplementary Table S3. Rare CNVs identified in proband requiring the mode of inheritance
Case ID	Submitted sample type (CVS, AF or Cord Blood)	Referral indication(s)	Rare CNV	Constitutional/mosaic	Mode of Inheritance	Final classification (P/LP, VUS, or benign)
19C0031	CVS	Previous child/ pregnancy with chr abn: Fetal anomalies: Previous baby 22q11, anxiety, NT 2.7mm	seq[GRCh37] del(3)(q26.1) chr3:g.165445629_165631240del	Constitutional	inherited	Benign
19C0202	AF	US: Fetal anomalies: Pulmonary valve stenosis + RV hypertrophy + severe TR	seq[GCRh37] del(6)(p25.1) chr6:g.5343458_5455434del	Constitutional	inherited	Benign
19C0303	AF	positive Down screening: Risk: 1:2 NT 3.3mm	seq[GRCh37] dup(9)(p24.1) chr9:g.4734127_5087666dup	Constitutional	inherited	VUS
19C0337	AF	Previous child/pregnancy with chr abn: previous MTOP for renal dysgenesis with aCGH microduplication 936.46 kb in 11q22.3	seq[GRCh37] dup(9)(q22.33) chr9:g.101343292_101677469dup	Constitutional	inherited	VUS
19C0339	AF	US: Fetal anomalies: cardiomegaly, pericardial effusion, thickened myometrium, enlarged liver	seq[GRCh37] del(16p13.3) chr16:g.217215_237434del	Constitutional	inherited	P/LP
19C0390	AF	ad mat age; Non-invasive prenatal screening: 22q11.21 (positive)	seq[GRCh37] del(22)(q11.2) chr22:g.18912979_21443877del	Constitutional	inherited	P/LP
19C0430	AF	US: Right fetal lateral ventriculomegaly	seq[GRCh37] del(1)(p31.1) chr1:g.74770647_74862203del	Constitutional	inherited	Benign
19C0486	CVS	US: Fetal anomalies: thicken NT 3.5mm, mild TR, left pleural effusion	seq[GRCh37] dup(15)(q21.3) chr15:g.57202051_58172103dup	Constitutional	de novo	Benign
19C0486	CVS	US: Fetal anomalies: thicken NT 3.5mm, mild TR, left pleural effusion	seq[GRCh37] dup(15)(q21.3) chr15:g.58177424_58501880dup	Constitutional	de novo	VUS
19C0614	AF	US: Fetal anomalies: Fetal cerebral ventriculomegaly	seq[GRCh37] dup(2)(q23.3) chr2:g.152716591_153168204dup	Constitutional	inherited	Benign
19C0691	CVS	US: Fetal anomalies: Thick N.T. with gross cystic hygroma, Safe T21 express normal	seq[GRCh37] dup(1)(p31.1) chr1:g.74501730_74710957dup	Constitutional	inherited	Benign
19C0695	CVS	US: NT 5.7mm	seq[GRCh37] dup(11)(p15.1) chr11:g.17760642_18078531dup	Constitutional	inherited	VUS
19C0818	Bld	US: Fetal anomalies: fetal anaemia	seq[GRCh37] dup(13)(q34) chr13:g.113665292_113783759dup	Constitutional	inherited	Benign
19C0818	Bld	US: Fetal anomalies: fetal anaemia	seq[GRCh37] del(15)(q15.1q15.2) chr15:g.42795048_42916681del	Constitutional	inherited	Benign
19C0828	AF	Non-invasive prenatal screening: SafeT21 express: elevation of DNA from a 4-Mb segment on chromosome 18q, spaning between 18q22.1-18q22.3 is detected	seq[GRCh37] dup(18)(q22.1) chr18:g.65874129_69662666dup	Constitutional	inherited	VUS
19C0855	CVS	US: Increased NT 4.75mm, absent nasal bone, increased placental thickness	seq[GRCh37] del(16p13.3) chr16:g.216050_235599del	Constitutional	inherited	P/LP
19C0909	AF	Maternal anxiety	seq[GRCh37] dup(22)(q12.3) chr22:g.36917213_36967862dup	Constitutional	inherited	Benign
19C1006	AF	Familial chr.abn.: 47,XN,+mar	seq[GRCh37] dup(2)(q11.1q11.2)dn chr2:g.95331353_100977256dup	Constitutional	de novo	P/LP
19C1149	CVS	US: Fetal anomalies: NT 5.22mm, suggestive cystic hygroma; positive Down screening risk: 1:2, T13 & T18 positive	seq[GRCh37] dup(8)(p21.2q24.3)dn chr8:g.23815054_146298884dup[0.2]	Mosaic	de novo	P/LP
19C1249	AF	US: Fetal anomalies: VSD coarctation of aorta	seq[GRCh37] dup(8)(q24.22) chr8:g.135633618_135790580dup	Constitutional	inherited	Benign
19C1316	CVS	US: Fetal anomalies: Omphalocele 1.85x1.74x1.91cm	seq[GRCh37] dup(16)(p13.11) chr16:g.14911322_16543602dup	Constitutional	de novo	Benign
19C1534	AF	Non-invasive prenatal screening: del(Xq13.2-q24,44.39M)	seq[GRCh37] del(X)(q13.2q24)dn chrX:g.73743276_117460856del	Constitutional	de novo	P/LP
19C1599	AF	Fetal anomalies: Hydrocephalus (Fetus)	seq[GRCh37] del(6)(p25.1) chr6:g.5479184_5598119del	Constitutional	inherited	Benign
19C1672	CVS	Translocation carrier: t(4;11)(p14;q14)	seq[GRCh37] dup(10)(p12.1) chr10:g.28416993_28865296dup	Constitutional	inherited	VUS
19C1728	AF	Fetal anomalies: Truncus arteriosus type II	seq[GRCh37] dup(2)(q23.3) chr2:g.25765190_25979975dup	Constitutional	inherited	Benign
19C1802	AF	positive Down screening risk: 1:50	seq[GRCh37] del(8p23.3p23.1) chr8:g.10134_10202794del	Constitutional	inherited	P/LP
19C1854	AF	USG: male, Non-invasive prenatal screening: SafeT21 twice borderline increase in chromosome 13	seq[GRCh37] del(13)(q34)dn chr13:g.114806588_115105104del	Constitutional	de novo	P/LP
19C2358	AF	US: Fetal anomalies: aberrant right subclavian artery, unilateral cystic dysplastic kidney, ? small ear, increased liquor. Non-invasive prenetal screening: 1st sample T21 showed borderline abnormal microdeletion, 2nd sample T21 normal.	seq[GRCh37] del(22)(q11.21)dn chr22:g.18912476_21530071del	Constitutional	de novo	P/LP
19C2382	CVS	ad mat age, US: NT 3.7mm	seq[GCRh37] dup(16)(p12.2) chr16:g.21970795_22474023dup	Constitutional	inherited	Benign
19C2579	CVS	US: fetal anomalies: NT 3.6mm	seq[GCRh37] del(8)(p23.1) chr8:g.10442630_10487248del	Constitutional	inherited	Benign
19C2678	AF	Positive Down Screening: Risk: 1:185	seq[GCRh37] dup(X)(p11.3) chrX:g.45837074_46945081dup	Constitutional	inherited	VUS
19C2721	AF	US: Fetal anomalies: Left little finger missing phalanges	seq[GCRh37] dup(3)(p22.3) chr3:g.32570567_33122809dup	Constitutional	inherited	Benign
19C2808	AF	US: Fetal anomalies: Rt buttock lymphangioma, retroperitoneal lymphangioma	seq[GCRh37] dup(3)(q26.31) chr3:g.172252418_173104875dup	Constitutional	inherited	Benign
19C2834	AF	US: Right sided aortic arch	seq[GRCh37] del(7)(p14.2)dn chr7:g.35462230_36830203del	Constitutional	de novo	P/LP
19C2924	AF	positive Down screening risk: 1:117, NT 1.9mm	seq[GRCh37] del(5)(p15.33p14.1)dn chr5:g.9994_26970792del	Constitutional	de novo	P/LP
19C3027	CVS	US: Fetal anomalies: NT 7.7 mm, umbilical hernia	seq[GRCh37] del(7)(q34q36.3)dn chr7:g.141319820_159121691del	Constitutional	de novo	P/LP
19C3027	CVS	US: Fetal anomalies: NT 7.7 mm, umbilical hernia	seq[GRCh37] dup(7)(p22.3p21.2)dn chr7:g.9992_15402317dup	Constitutional	de novo	P/LP
19C3275	AF	Non-invasive prenatal screening: sex chromosome number less than normal	seq[GCRh37] dup(7)(p21.1) chr7:g.17870005_18427306dup	Constitutional	inherited	Benign
19C3280	AF	Non-invasive prenatal screening: increase 10q	seq[GRCh37] dup(10)(q11.22q11.23)dn chr10:g.47071337_51834810dup	Constitutional	de novo	P/LP
19C3360	AF	US: Fetal anomalies: severe hydrocephalus (Rt Vp 1.77cm, Lt Vp 2.27cm), ACC	seq[GRCh37] dup(X)(p22.31) chrX:g.8470229_8682525dup	Constitutional	inherited	Benign
19C3440	AF	Non-invasive prenatal screening: mild decrease 11.5 Mb at 8q11.21-8q12.1	seq[GRCh37] dup(X)(q21.33) chrX:g.96194144_96687031dup	Constitutional	inherited	VUS
19C3464	AF	US: Fetal anomalies: SUA, megacystis, NT 3.7 mm, PS, MR, TR, echogenic bowel, hydrops	seq[GRCh37] dup(16)(p11.2) chr16:g.28487035_29439156dup	Constitutional	de novo	VUS
19C3543	AF	ad mat age; Non-invasive prenatal screening: Reduction of DNA from a 4.0 Mb segment on chromosome 16p, spanning between 16p13.1-16p12.3 is detected	seq[GRCh37] dup(1)(q41) chr1:g.219577267_219643290dup	Constitutional	inherited	VUS
19C3563	CVS	US: Fetal anomalies: cardiomegaly, tricuspid valve abn, +/- pul. valve abn	seq[GRCh37] del(20)(q13.33) chr20:g.61942378_62945038del[0.5]	Mosaic	de novo	VUS
19C3615	CVS	US: NT 4.8mm	seq[GRCh37] del(15)(q13.3) chr15:g.31978294_32718966del	Constitutional	inherited	VUS
20C0010	AF	US: Fetal anomalies: NT4.0mm at 12 weeks, small gall bladder	seq[GRCh37] del(10)(q21.3) chr10:g.68406356_68682739del	Constitutional	inherited	Benign
20C0034	AF	Non-invasive prenatal screening: abnormal sex chromosome, low level of Y	seq[GRCh37] del(Y)(q11.21q12)dn chrY:g.13874367_58993066del	Constitutional	de novo	P/LP
20C0177	AF	US: Fetal anomalies: cardiomegaly, mild TR, thickened myocardium, dilated renal pelvis	seq[GRCh37] dup(7)(p22.1) chr7:g.5757506_5935838dup	Constitutional	inherited	Benign
20C0285	AF	Non-invasive prenatal screening: 22q11 deletion	seq[GRCh37] dup(22)(q11.21) chr22:g.20668378_21521916dup	Constitutional	inherited	Benign
20C0315	AF	Took methotrexate 2/12 before conception	seq[GRCh37] dup(X)(p22.32p22.31) chrX:g.5897499_6443708dup	Constitutional	inherited	Benign
20C0339	AF	US: Fetal anomalies: fetal right arotic arch, Non- invasive prenatal screening: China: 22q deletion	seq[GRCh37] del(22)(q11.21)dn chr22:g.18871037_21521916del	Constitutional	de novo	P/LP
20C0475	AF	ad mat age, positive Down screening risk: 1:2	seq[GRCh37] del(9)(q34.3)dn chr9:g.140608440_140673160del	Constitutional	de novo	P/LP
20C0479	AF	Fetal anomalies: NT 3.4mm; Previous child/ pregnancy with chr abn: (baby) hearing impairment GJB2 mutation	seq[GRCh37] dup(1)(q24.3) chr1:g.171700811_171956781dup	Constitutional	inherited	VUS
20C0479	AF	Fetal anomalies: NT 3.4mm; Previous child/ pregnancy with chr abn: (baby) hearing impairment GJB2 mutation	seq[GRCh37] dup(14)(q22.1) chr14:g.53558999_53705874dup	Constitutional	inherited	Benign
20C0726	AF	US: Fetal anomalies: intracardiac echogenic foci + echogenic bowel	seq[GRCh37] del(8)(p23.1) chr8:g.6226691_6494457del	Constitutional	de novo	Benign
20C0756	AF	US: Fetal anomalies: ventriculomegaly right 10-11mm	seq[GRCh37] del(8)(p11.21) chr8:g.42305781_42400300del	Constitutional	inherited	VUS
20C0776	CVS	positive Down screening risk: 1:99	seq[GRCh37] del(1)(q43) chr1:g.239625614_240628419del	Constitutional	inherited	VUS
20C0842	AF	Non-invasive prenatal screening: 4p15.1 deletion	seq[GRCh37] del(4)(p15.1) chr4:g.31613878_34217812del	Constitutional	inherited	Benign
20C0948	AF	USG today at 16+4 wk showed borderline ventriculomegaly, ? Agenesis of corpus callosum, Non-invasive prenatal screening: increased DNA from 33 Mb segment on chromosome 8q, between 8q22.1-8q24.21	seq[GRCh37] dup(1)(q43) chr1:g.241666360_241747809dup	Constitutional	inherited	Benign
20C1319	AF	Non-invasive prenatal screening: low fetal fraction	seq[GRCh37] dup(15)(q21.1) chr15:g.45152735_45735090dup	Constitutional	inherited	Benign
20C1327	AF	US: Fetal anomalies: bilateral dilated ventricles of brain, hypoplasia of cerebellum	seq[GRCh37] dup(10)(p14p13) chr10:g.11809169_12651523dup	Constitutional	inherited	Benign
20C1539	AF	US: Fetal anomalies: Fetal cleft lip + palate	seq[GRCh37] dup(X)(p11.22) chrX:g.53517366_53686493dup	Constitutional	inherited	P/LP
20C1831	AF	Non-invasive prenatal screening: SafeT21: decreased Xp chromosome	seq[GRCh37] del(X)(p22.33p11.21)dn chrX:g.59997_57457892del	Constitutional	de novo	P/LP
20C1831	AF	Non-invasive prenatal screening: SafeT21: decreased Xp chromosome	seq[GRCh37] dup(X)(p11.21q28)dn chrX:g.57483831_154926366dup[0.6]	Mosaic	de novo	P/LP
20C1984	AF	ad mat age, US: NT 4.8mm at 12 weeks, smallchin, ? Cleft palate	seq[GRCh37] del(7)(p22.1) chr7:g.6012914_6583141del	Constitutional	de novo	VUS
20C2141	AF	Familial chr: abn: α-thal couple	seq[GRCh37] dup(18)(p11.21) chr18:g.11002045_11525880dup	Constitutional	inherited	Benign
20C2164	AF	US: Fetal anomalies: sinus bradycardia, VSD	seq[GRCh37] dup(7)(q35) chr7:g.146741996_147611486dup	Constitutional	inherited	Benign
20C2164	AF	US: Fetal anomalies: sinus bradycardia, VSD	seq[GRCh37] dup(15)(q26.3) chr15:g.101669317_102189783dup	Constitutional	inherited	Benign
20C2396	AF	ad mat age, Non-invasive prenatal screening: HR for monosomy x on Panorama test	seq[GRCh37] del(X)(p22.33p11.21)dn chrX:g.59997_58071562del	Constitutional	de novo	P/LP
20C2396	AF	ad mat age, Non-invasive prenatal screening: HR for monosomy x on Panorama test	seq[GRCh37] delX)(p11.21q28)dn chrX:g.58071563_154926366del[0.3]	Mosaic	de novo	P/LP
20C2527	AF	ad mat age, Previous child/ pregnancy with chr abn: previous fetal T21, Non-invasive prenatal screening: sex not reportable	seq[GRCh37] dup(Y)(p11.31q11.221)dn chrY:g.2649473_19567688dup[0.2]	Mosaic	de novo	P/LP
20C2527	AF	ad mat age, Previous child/ pregnancy with chr abn: previous fetal T21, Non-invasive prenatal screening: sex not reportable	seq[GRCh37] del(Y)(Yq11.221q12)dn chrY:g.19567689_59033394del[0.7]	Mosaic	de novo	P/LP
20C2543	AF	US: bil ventriculomegaly & persistent left SVC, Non-invasive prenatal screening: dup (6q15-q22.31, 31.39M)	seq[GRCh37] dup(6)(p11.21q28)dn chr6:g.88978285_120313449dup	Constitutional	de novo	P/LP
20C2582	AF	Non-invasive prenatal screening: 10q11.22-10q21.1, 4MB deletion	seq[GRCh37] del(10)(q11.22q11.23) chr10:g.49225801_51126687del	Constitutional	inherited	VUS
20C2582	AF	Non-invasive prenatal screening: 10q11.22-10q21.1, 4MB deletion	seq[GRCh37] del(10)(q11.23) chr10:g.51738639_52457286del	Constitutional	inherited	Benign
20C2630	AF	Non-invasive prenatal screening: Deletion of Xq21.1-Xq21.33, 19 Mb	seq[GRCh37] delX)(q21.1q21.33)dn chrX:g.78856351_98168694del	Constitutional	de novo	P/LP
20C2935	AF	Non-invasive prenatal screening: High risk 22q11.2 DiGeorge	seq[GRCh37] del(22)(q11.21)dn chr22:g.18912979_21443877del	Constitutional	de novo	P/LP
20C3008	Bld	US: Fetal anomalies: Amniotic band syndrome involving digits of all 4 limbs	seq[GRCh37] dup(1)(p21.2) chr1:g.100043465_100751526dup	Constitutional	inherited	Benign
20C3032	AF	US: Fetal anomalies: cystic hygroma, Non-invasive prenatal screening: increased DNA from chromosome 4 of spanning between 4q28.2-4q32.3	seq[GRCh37] dup(4)(q28.3)dn chr4:g.131115786_134164088dup	Constitutional	de novo	P/LP
20C3032	AF	US: Fetal anomalies: cystic hygroma, Non-invasive prenatal screening: increased DNA from chromosome 4 of spanning between 4q28.2-4q32.3	seq[GRCh37] dup(4)(q28.3q32.3)dn chr4:g.135792847_165054846dup	Constitutional	de novo	P/LP
20C3078	AF	Non-invasive prenatal screening: NIFTY: del(22q11.2, 2.85M)	seq[GRCh37] del(22)(q11.21)dn chr22:g.18912979_21443877del	Constitutional	de novo	P/LP
21C0034	AF	US: Fetal anomalies: ventriculomegaly, hypoplastic aorta	seq[GRCh37] del(16)(p11.2) chr16:g.29582704_30197139del	Constitutional	inherited	P/LP
21C0064	AF	Non-invasive prenatal screening: del(13q13.3-q14.11, 5.68M)	seq[GRCh37] del(13)(q13.3q14.11) chr13:g.37949747_44057552del	Constitutional	de novo	VUS
21C0144	AF	US: Fetal anomalies: single umbilical artery seen, fetal heart is deviated to the left, PA (3.8mm) larger then AO (2.3mm), RV (10.9mm) appears larger then LV (7.6mm), an extra vessel is noted to the left of the pulmonary artery at the cardiac three vessel view – suspicious of a persistent left superior vena cava, myocardium appears thickened on right side (thickness: 3.5 mm), report attached	seq[GRCh37] dup(1)(p34.1) chr1:g.46237043_46714516dup	Constitutional	inherited	Benign

## Sheet: Supp Table S4
Supplementary Table S4. PCR primers used for verification of CNVs
Case ID	de novo CNV	Primer ID	Forward primer	Reverse primer
19C1529	seq[GRCh37] del(11)(q22.3) chr11:g.103459654_103644318del	1	TCTGCACATTCCACTCTACCTAT	TGTCCTCCTCCATGCAGTTAATA
19C1529	seq[GRCh37] del(11)(q22.3) chr11:g.103459654_103644318del	2	CGGCATGCCTTACAGATAAAATG	TCACCATGAACTTTAGGGCAAAT
19C1529	seq[GRCh37] dup(X)(q27.3) chrX:g.144285467_144364278dup	3	GTTAAAGGGGTTCTGGAGTTCTG	TGACCAGCCGCTCTTCTATATTA
19C1529	seq[GRCh37] dup(X)(q27.3) chrX:g.144285467_144364278dup	4	TCACAAGCAATCCACTAACTTCC	CACAACTTGCTGTATTCTCCCTT
19C1778	seq[GRCh37] dup(18)(q12.3) chr18:g.42995657_43104692dup	5	TTTGGCTTATTCGACCTTGTCTC	TTGTATGACATCACAGCAACCTC
19C1778	seq[GRCh37] dup(18)(q12.3) chr18:g.42995657_43104692dup	6	TCAAAAGTCAAATCTGTGCAAATGA	GCACTTTTGTCCAGGCATGATC
19C1911	seq[GRCh37] dup(2)(q21.1) chr2:g.130782545_131141746dup	7	ACCAACACATCTGCATCTAAGTG	TTGGTTTGGATAATCTGCTGTCC
19C1911	seq[GRCh37] dup(2)(q21.1) chr2:g.130782545_131141746dup	8	CCCACAATCAGCAGCGAA	TCATTCTGTTTCGTGGACATTACT
19C2076	seq[GRCh37] del(8)(q23.1) chr8:g.110109537_110219129del	9	GAGCATTGATGAGAAAGGTGTCA	AATGAATAGTCCAGTGCACAGTG
19C2076	seq[GRCh37] del(8)(q23.1) chr8:g.110109537_110219129del	10	TCTTTCCCTCAAATATCTTGGCTG	AGCCACTATACTTGCACATGAAC
19C3367	seq[GRCh37] del(12)(q24.32) chr12:g.126935424_126993422del	11	AGCATAACATGGAGAAGGGAGAT	GAATCCTACACTTCAGTTTCGCA
19C3367	seq[GRCh37] del(12)(q24.32) chr12:g.126935424_126993422del	12	ATAATTTAGGATTGTCTGCCGGG	ACATATCTCATTTCCACATTTAGCAT
19C3556	seq[GRCh37] dup(5)(q12.1) chr5:g.62039757_62107787dup	13	ACTGTTGTGTACTATCCCCTAGC	GGTACAGGTGGGACTTGAGAAAG
19C3556	seq[GRCh37] dup(5)(q12.1) chr5:g.62039757_62107787dup	14	ACTGTTGTGTACTATCCCCTAGC	GGTACAGGTGGGACTTGAGAAAG
19C3563	seq[GRCh37] del(6)(q22.31) chr6:g.118750320_118865060del	15	TCTGGTTCAGCATCTTTGACTTC	TGATGTGGTATGCTTTGAGGAAC
19C3563	seq[GRCh37] del(6)(q22.31) chr6:g.118750320_118865060del	16	TCCCAAACCTTTTAGCTGTACAA	ACATCACCTTAACAGAACCGAGA
20C1011	seq[GRCh37] del(8)(q23.2) chr8:g.111229945_111294607del	17	TTCCACCACCGTATTTTGTAGTG	CAGATTAAAAGCTCTTGAGGGCA
20C1011	seq[GRCh37] del(8)(q23.2) chr8:g.111229945_111294607del	18	AGCCCAATATAGAAAGTTAATCCCA	TCAGTTCCTTAATACTCTCTGGGA
20C1831	seq[GRCh37] del(4)(q28.3) chr4:g.134921991_135192465del	19	GCTTTTACTTCTTTATCTCCTTTGCC	AGAATATATGGATTGGCGTTTGTCT
20C1831	seq[GRCh37] del(4)(q28.3) chr4:g.134921991_135192465del	20	CACTTTGATAGCTTGCAGAAGGA	CCACTGTCCCTAAATTCCCTCTA

## Sheet: Supp Table S5
Supplementary Table S5. Cases with aneuploidies
Case ID	Submitted sample type (CVS, AF or Cord Blood)	Referral indication(s)	Aneuploidies	Constitutional/mosaic
19C0514	AF	Non-invasive prenatal screening: 45 XO	seq[GRCh37] del(X)(p22.33q28)dn chrX:g.59997_154926366del	Constitutional
19C1685	AF	USG showed male genitalia; positive Down screening risk: 1:30; Non-invasive prenatal screening: 45,XO	seq[GRCh37] dup(Y)(p11.31q12)dn chrY:g.2649473_59033394dup	Constitutional
19C1686	CVS	US: Fetal anomalies: diffuse cystic placenta, plcental thickness 2.39 cm	seq[GRCh37] dup(7)(p22.3q36.3)dn chr7:g.9992_159123784dup[0.1]	Mosaic
19C1686	CVS	US: Fetal anomalies: diffuse cystic placenta, plcental thickness 2.39 cm	seq[GRCh37] dup(10)(p15.3q26.3)dn chr10:g.61812_135511672dup[0.1]	Mosaic
19C2910	AF	US: 1) small VSD, 2) echogenic cranium, 3.NIPT showed X abnormality	seq[GRCh37] dup(X)(p22.33q28)dn chrX:g.59997_154926366dup	Constitutional
19C3078	AF	Non-invasive prenatal screening: Non-informative for sex chromosome aneuploidy	seq[GRCh37] del(Y)(p11.31q12)dn chrY:g.2649473_59033394[0.1]	Mosaic
19C3641	AF	Non-invasive prenatal screening: NIPT: high risk XXY	seq[GRCh37] dup(X)(p22.33q28)dn chrX:g.60000_154929601dup	Constitutional
20C0409	CVS	Non-invasive prenatal screening: high risk of T21	seq[GRCh37] dup(21)(21p11.2q22.3)dn chr21:g.9411195_48098942dup	Constitutional
20C0583	AF	Non-invasive prenatal screening: positive for 45X	seq[GRCh37] dup(X)(p22.33q28)dn chrX:g.59997_154926366dup[0.6]	Mosaic
20C1320	AF	ad mat age, US: Fetal anomalies: Hypoplastic nasal bone, Non-invasive prenatal screening: History of abnormal SafeT21: high risk for T18 but another SafeT21 was normal	seq[GRCh37] dup(18)(p11.32q23)dn chr18:g.10000_78012026dup[0.3]	Mosaic
20C1522	AF	Non-invasive prenatal screening: high risk XXY	seq[GRCh37] dup(X)(p22.33q28)dn chrX:g.60000_154929601dup	Constitutional
20C2276	AF	ad mat age, Non-invasive prenatal screening: NIFTY- 47XYY	seq[GRCh37] dup(X)(p22.33q28)dn chrX:g.60000_154929601dup	Constitutional
20C2679	CVS	US: Fetal anomalies: DCDA twins with left twin NT 4.1mm	seq[GRCh37] dup(21)(p11.2q22.3)dn chr21:g.9411195_48098942dup	Constitutional
20C2834	AF	ad mat age, Non-invasive prenatal screening: high risk of XXX	seq[GRCh37] dup(X)(p22.33q28)dn chrX:g.59997_154926366dup	Constitutional
